# Supplementary material for: Prevalence and risk factors of sarcopenia and effect of sarcopenia on functional status and falls incidents among the elderly in Selangor
Source: PeerJ. 2025 Oct 17;13:e20175. doi: 10.7717/peerj.20175 (PMC12536799; doi:10.7717/peerj.20175)
Supplement: Supplemental Information 1 [file peerj-13-20175-s001.xlsx]

## Sheet: Sheet1
ID Number	Age	Gender	Locality	Race	Marital status	Level of education	Occupation	Household income	Smoking status	Alcohol consumption status	Physical activity	DM type2	Hypertension	Dyslipidemia	Cardiovascular disease	Osteoporosis	GDS score	Depression	ADL score	ADL	IADL score	IADL	Falls incidents	Frequency of falls	Types of injury	Treatment	Location of falls	Average hand grip strength	5-time chair stand test	Appendicular skeletal mass	Sarcopenia classification
1	60-74	Female	Kuala Langat	Chinese	Married	Primary or less	Housewife	B 40	Never smoked	Never drinked	Active	No	No	No	No	No	0	No	20	No dependency	8	No dependency	No	0	No injuries	Not treated	Not applicable	18	12	6.6	No sarcopenia
2	>75	Female	Petaling	Indian	Married	Tertiary	Retired	M 40	Never smoked	Ex-drinker	Active	No	Yes	Yes	No	No	1	No	19	Dependency	8	No dependency	Yes	1	Severe injury	Admitted to hospital	House yard	18	11	6.5	No sarcopenia
3	60-74	Female	Kuala Langat	Chinese	Married	Primary or less	Housewife	B 40	Never smoked	Never drinked	Inactive	Yes	Yes	Yes	No	No	2	Yes	20	No dependency	8	No dependency	No	0	No injuries	Not treated	Not applicable	18	11	6.1	No sarcopenia
4	>75	Female	Kuala Langat	Chinese	Married	Primary or less	Housewife	B 40	Never smoked	Never drinked	Inactive	No	Yes	Yes	No	No	0	No	20	No dependency	8	No dependency	No	0	No injuries	Not treated	Not applicable	18	11	6.1	No sarcopenia
5	>75	Female	Kuala Langat	Chinese	Married	Primary or less	Housewife	B 40	Never smoked	Never drinked	Inactive	Yes	Yes	Yes	Yes	No	0	No	17	Dependency	3	Dependency	Yes	1	Minor injury	Self treated	Inside the house	18	11	5.7	No sarcopenia
6	>75	Female	Kuala Langat	Malay	Widowed or divorced	Secondary	Retired	B 40	Never smoked	Never drinked	Inactive	No	Yes	Yes	No	No	0	No	20	No dependency	8	No dependency	No	0	No injuries	Not treated	Not applicable	18	10	6.6	No sarcopenia
7	60-74	Female	Petaling	Malay	Widowed or divorced	Secondary	Housewife	B 40	Never smoked	Never drinked	Inactive	No	No	Yes	No	No	0	No	20	No dependency	8	No dependency	No	0	No injuries	Not treated	Not applicable	18	10	5.8	No sarcopenia
8	60-74	Female	Kuala Langat	Malay	Married	Secondary	Housewife	B 40	Never smoked	Never drinked	Inactive	No	Yes	No	No	No	0	No	20	No dependency	8	No dependency	No	0	No injuries	Not treated	Not applicable	18	9	6.2	No sarcopenia
9	60-74	Female	Kuala Langat	Chinese	Married	Primary or less	Housewife	B 40	Never smoked	Alcohol drinker	Inactive	No	No	Yes	No	No	0	No	20	No dependency	8	No dependency	No	0	No injuries	Not treated	Not applicable	18.33	10	6.2	No sarcopenia
10	60-74	Female	Petaling	Malay	Widowed or divorced	Secondary	Housewife	B 40	Never smoked	Never drinked	Inactive	No	No	No	No	No	0	No	20	No dependency	8	No dependency	Yes	2	Minor injury	Outpatient	Inside the house	18.67	12	7	No sarcopenia
11	60-74	Female	Kuala Langat	Malay	Married	Secondary	Housewife	B 40	Never smoked	Never drinked	Inactive	Yes	Yes	Yes	No	No	0	No	20	No dependency	8	No dependency	No	0	No injuries	Not treated	Not applicable	18.67	12	6.6	No sarcopenia
12	60-74	Female	Petaling	Chinese	Married	Secondary	Housewife	B 40	Active smoker	Never drinked	Inactive	No	Yes	No	No	No	0	No	20	No dependency	8	No dependency	No	0	No injuries	Not treated	Not applicable	18.67	11	5.9	No sarcopenia
13	>75	Female	Petaling	Chinese	Married	Secondary	Housewife	B 40	Never smoked	Alcohol drinker	Inactive	No	Yes	No	No	No	0	No	20	No dependency	7	Dependency	No	0	No injuries	Not treated	Not applicable	18.67	10	5.7	No sarcopenia
14	60-74	Female	Kuala Langat	Chinese	Married	Secondary	Housewife	B 40	Never smoked	Never drinked	Inactive	Yes	No	Yes	No	No	0	No	20	No dependency	8	No dependency	No	0	No injuries	Not treated	Not applicable	19	10	6.2	No sarcopenia
15	60-74	Female	Kuala Langat	Malay	Married	Primary or less	Housewife	B 40	Never smoked	Never drinked	Inactive	No	No	No	No	No	0	No	20	No dependency	8	No dependency	No	0	No injuries	Not treated	Not applicable	19.33	11	6	No sarcopenia
16	60-74	Female	Kuala Langat	Chinese	Married	Primary or less	Housewife	B 40	Never smoked	Alcohol drinker	Active	No	No	No	No	No	0	No	20	No dependency	8	No dependency	No	0	No injuries	Not treated	Not applicable	19.33	9	6	No sarcopenia
17	60-74	Female	Kuala Langat	Chinese	Married	Secondary	Housewife	B 40	Never smoked	Never drinked	Inactive	No	Yes	Yes	No	No	0	No	20	No dependency	8	No dependency	No	0	No injuries	Not treated	Not applicable	19.33	9	6.3	No sarcopenia
18	60-74	Female	Kuala Langat	Chinese	Married	Secondary	Housewife	B 40	Never smoked	Never drinked	Inactive	No	Yes	No	No	No	1	No	20	No dependency	6	Dependency	Yes	1	Minor injury	Outpatient	Outside the house	19.67	10	6.9	No sarcopenia
19	60-74	Female	Kuala Langat	Chinese	Married	Primary or less	Housewife	B 40	Never smoked	Never drinked	Inactive	No	No	No	No	No	0	No	20	No dependency	5	Dependency	No	0	No injuries	Not treated	Not applicable	20	12	5.7	No sarcopenia
20	60-74	Female	Kuala Langat	Chinese	Married	Primary or less	Housewife	B 40	Never smoked	Never drinked	Inactive	No	No	No	No	No	0	No	20	No dependency	8	No dependency	No	0	No injuries	Not treated	Not applicable	20	10	5.9	No sarcopenia
21	60-74	Female	Petaling	Malay	Widowed or divorced	Secondary	Housewife	B 40	Never smoked	Never drinked	Active	Yes	Yes	Yes	No	No	0	No	20	No dependency	8	No dependency	No	0	No injuries	Not treated	Not applicable	20.33	9	6.6	No sarcopenia
22	60-74	Female	Kuala Langat	Chinese	Married	Primary or less	Housewife	B 40	Never smoked	Never drinked	Active	No	No	No	No	No	0	No	20	No dependency	8	No dependency	No	0	No injuries	Not treated	Not applicable	20.33	6	6.3	No sarcopenia
23	60-74	Female	Kuala Langat	Chinese	Married	Primary or less	Housewife	B 40	Never smoked	Alcohol drinker	Inactive	No	No	No	No	No	0	No	20	No dependency	8	No dependency	No	0	No injuries	Not treated	Not applicable	21.67	12	6.5	No sarcopenia
24	60-74	Female	Petaling	Indian	Married	Secondary	Housewife	B 40	Never smoked	Never drinked	Inactive	No	No	No	No	No	0	No	20	No dependency	8	No dependency	No	0	No injuries	Not treated	Not applicable	21.67	11	6.3	No sarcopenia
25	60-74	Female	Kuala Langat	Chinese	Married	Primary or less	Housewife	B 40	Never smoked	Never drinked	Inactive	No	No	Yes	No	No	0	No	20	No dependency	8	No dependency	No	0	No injuries	Not treated	Not applicable	21.67	10	7.1	No sarcopenia
26	60-74	Female	Petaling	Malay	Married	Secondary	Housewife	B 40	Never smoked	Never drinked	Active	Yes	Yes	Yes	No	No	2	Yes	20	No dependency	8	No dependency	No	0	No injuries	Not treated	Not applicable	22	10	7.2	No sarcopenia
27	60-74	Female	Kuala Langat	Chinese	Married	Primary or less	Housewife	B 40	Never smoked	Never drinked	Inactive	No	Yes	Yes	No	No	0	No	20	No dependency	8	No dependency	No	0	No injuries	Not treated	Not applicable	22	8	7.3	No sarcopenia
28	60-74	Female	Kuala Langat	Malay	Married	Primary or less	Working	B 40	Never smoked	Never drinked	Inactive	No	Yes	Yes	No	No	0	No	20	No dependency	8	No dependency	No	0	No injuries	Not treated	Not applicable	22.33	12	6	No sarcopenia
29	60-74	Female	Kuala Langat	Indian	Married	Secondary	Housewife	B 40	Never smoked	Never drinked	Active	Yes	No	No	No	No	0	No	20	No dependency	8	No dependency	No	0	No injuries	Not treated	Not applicable	22.33	11	6.8	No sarcopenia
30	60-74	Female	Petaling	Chinese	Married	Secondary	Working	B 40	Never smoked	Never drinked	Active	No	Yes	No	No	No	0	No	20	No dependency	8	No dependency	No	0	No injuries	Not treated	Not applicable	22.33	8	5.9	No sarcopenia
31	60-74	Female	Petaling	Chinese	Married	Secondary	Housewife	B 40	Never smoked	Never drinked	Inactive	No	No	Yes	No	No	0	No	20	No dependency	8	No dependency	No	0	No injuries	Not treated	Not applicable	22.67	10	6.8	No sarcopenia
32	60-74	Female	Kuala Langat	Malay	Married	Secondary	Housewife	B 40	Never smoked	Never drinked	Inactive	No	Yes	Yes	No	No	0	No	20	No dependency	8	No dependency	Yes	1	Minor injury	Self treated	Inside the house	22.67	7	5.9	No sarcopenia
33	60-74	Female	Petaling	Malay	Married	Primary or less	Housewife	B 40	Never smoked	Never drinked	Active	No	No	Yes	No	No	0	No	20	No dependency	8	No dependency	No	0	No injuries	Not treated	Not applicable	23	9	6.2	No sarcopenia
34	60-74	Female	Petaling	Indian	Married	Secondary	Housewife	B 40	Never smoked	Never drinked	Inactive	No	Yes	No	No	No	0	No	19	Dependency	7	Dependency	Yes	3	Minor injury	Self treated	Bathroom/toilet	23.67	12	7.2	No sarcopenia
35	60-74	Female	Kuala Langat	Malay	Married	Primary or less	Retired	B 40	Never smoked	Never drinked	Active	Yes	Yes	Yes	No	No	0	No	20	No dependency	8	No dependency	No	0	No injuries	Not treated	Not applicable	23.67	12	6	No sarcopenia
36	60-74	Female	Kuala Langat	Malay	Married	Secondary	Working	B 40	Never smoked	Never drinked	Inactive	No	Yes	Yes	No	No	0	No	20	No dependency	8	No dependency	No	0	No injuries	Not treated	Not applicable	23.67	11	7.1	No sarcopenia
37	60-74	Female	Kuala Langat	Chinese	Married	Primary or less	Housewife	B 40	Never smoked	Never drinked	Active	No	No	Yes	No	No	0	No	20	No dependency	8	No dependency	No	0	No injuries	Not treated	Not applicable	23.67	10	6.7	No sarcopenia
38	60-74	Female	Kuala Langat	Chinese	Married	Primary or less	Housewife	B 40	Never smoked	Never drinked	Active	No	Yes	Yes	No	No	0	No	20	No dependency	8	No dependency	No	0	No injuries	Not treated	Not applicable	24.67	11	6.6	No sarcopenia
39	60-74	Female	Kuala Langat	Indian	Married	Tertiary	Retired	M 40	Never smoked	Never drinked	Active	Yes	No	Yes	No	Yes	0	No	20	No dependency	8	No dependency	Yes	1	Severe injury	Admitted to hospital	House yard	24.67	8	5.7	No sarcopenia
40	60-74	Female	Kuala Langat	Indian	Married	Secondary	Housewife	B 40	Never smoked	Never drinked	Inactive	Yes	Yes	Yes	No	No	0	No	20	No dependency	8	No dependency	No	0	No injuries	Not treated	Not applicable	24.67	8	8	No sarcopenia
41	60-74	Female	Petaling	Chinese	Widowed or divorced	Secondary	Retired	B 40	Never smoked	Never drinked	Inactive	No	No	Yes	No	Yes	0	No	19	Dependency	8	No dependency	No	0	No injuries	Not treated	Not applicable	25	9	6.4	No sarcopenia
42	>75	Male	Petaling	Malay	Married	Secondary	Retired	B 40	Active smoker	Never drinked	Inactive	No	No	Yes	No	Yes	0	No	17	Dependency	3	Dependency	Yes	2	Severe injury	Admitted to hospital	House yard	25.67	12	6.1	No sarcopenia
43	60-74	Male	Petaling	Indian	Married	Primary or less	Working	B 40	Never smoked	Alcohol drinker	Inactive	Yes	Yes	No	No	No	0	No	20	No dependency	8	No dependency	Yes	1	Minor injury	Self treated	House yard	26.33	11	7.8	No sarcopenia
44	60-74	Male	Petaling	Malay	Widowed or divorced	Secondary	Working	B 40	Ex-smoker	Never drinked	Active	No	No	Yes	No	No	0	No	20	No dependency	8	No dependency	No	0	No injuries	Not treated	Not applicable	26.33	10	7	No sarcopenia
45	60-74	Female	Kuala Langat	Malay	Married	Primary or less	Housewife	B 40	Never smoked	Never drinked	Inactive	Yes	Yes	No	No	No	2	Yes	20	No dependency	8	No dependency	Yes	1	Minor injury	Self treated	House yard	27.67	8	6.7	No sarcopenia
46	60-74	Male	Petaling	Indian	Married	Secondary	Working	B 40	Never smoked	Alcohol drinker	Inactive	No	Yes	No	No	No	0	No	20	No dependency	8	No dependency	No	0	No injuries	Not treated	Not applicable	28	12	7.1	No sarcopenia
47	60-74	Male	Petaling	Indian	Single	Tertiary	Not employed	B 40	Never smoked	Alcohol drinker	Inactive	No	Yes	Yes	Yes	No	0	No	20	No dependency	8	No dependency	No	0	No injuries	Not treated	Not applicable	28	12	7.1	No sarcopenia
48	60-74	Male	Petaling	Malay	Widowed or divorced	Primary or less	Retired	B 40	Never smoked	Never drinked	Inactive	Yes	Yes	Yes	No	No	0	No	20	No dependency	8	No dependency	No	0	No injuries	Not treated	Not applicable	28	12	8.2	No sarcopenia
49	>75	Male	Kuala Langat	Malay	Married	Tertiary	Retired	M 40	Never smoked	Never drinked	Inactive	Yes	Yes	Yes	No	No	0	No	19	Dependency	6	Dependency	No	0	No injuries	Not treated	Not applicable	28	12	7.9	No sarcopenia
50	60-74	Male	Petaling	Malay	Married	Primary or less	Working	B 40	Active smoker	Never drinked	Inactive	No	Yes	No	No	No	0	No	20	No dependency	8	No dependency	No	0	No injuries	Not treated	Not applicable	28	12	7.4	No sarcopenia
51	>75	Male	Kuala Langat	Indian	Married	Secondary	Retired	B 40	Never smoked	Alcohol drinker	Inactive	No	Yes	Yes	No	No	0	No	20	No dependency	8	No dependency	No	0	No injuries	Not treated	Not applicable	28	12	7.6	No sarcopenia
52	60-74	Male	Petaling	Malay	Married	Secondary	Not employed	B 40	Never smoked	Never drinked	Inactive	No	Yes	Yes	Yes	No	0	No	20	No dependency	8	No dependency	No	0	No injuries	Not treated	Not applicable	28	11	9.1	No sarcopenia
53	60-74	Male	Kuala Langat	Malay	Married	Tertiary	Retired	B 40	Never smoked	Never drinked	Inactive	Yes	Yes	Yes	No	No	0	No	20	No dependency	8	No dependency	No	0	No injuries	Not treated	Not applicable	28	11	7.9	No sarcopenia
54	60-74	Male	Petaling	Malay	Married	Secondary	Retired	B 40	Never smoked	Never drinked	Active	No	No	No	No	No	0	No	18	Dependency	8	No dependency	No	0	No injuries	Not treated	Not applicable	28	11	7.9	No sarcopenia
55	>75	Male	Kuala Langat	Chinese	Married	Primary or less	Not employed	B 40	Never smoked	Alcohol drinker	Inactive	No	Yes	Yes	No	No	0	No	20	No dependency	8	No dependency	No	0	No injuries	Not treated	Not applicable	28	11	7.9	No sarcopenia
56	60-74	Male	Kuala Langat	Chinese	Married	Primary or less	Working	B 40	Ex-smoker	Alcohol drinker	Inactive	Yes	Yes	Yes	No	No	0	No	20	No dependency	8	No dependency	No	0	No injuries	Not treated	Not applicable	28	10	7.9	No sarcopenia
57	>75	Male	Petaling	Chinese	Married	Tertiary	Working	B 40	Never smoked	Never drinked	Active	No	Yes	No	No	No	0	No	20	No dependency	8	No dependency	No	0	No injuries	Not treated	Not applicable	28	9	7	No sarcopenia
58	60-74	Male	Kuala Langat	Indian	Married	Primary or less	Working	B 40	Never smoked	Never drinked	Inactive	Yes	Yes	Yes	Yes	No	0	No	20	No dependency	8	No dependency	No	0	No injuries	Not treated	Not applicable	28	8	8.3	No sarcopenia
59	60-74	Male	Kuala Langat	Malay	Married	Tertiary	Retired	B 40	Ex-smoker	Never drinked	Inactive	No	No	No	No	No	0	No	20	No dependency	8	No dependency	No	0	No injuries	Not treated	Not applicable	28	7	7.8	No sarcopenia
60	60-74	Female	Kuala Langat	Malay	Married	Secondary	Housewife	B 40	Never smoked	Never drinked	Inactive	No	Yes	No	No	No	0	No	20	No dependency	8	No dependency	No	0	No injuries	Not treated	Not applicable	28.33	12	7.8	No sarcopenia
61	60-74	Male	Kuala Langat	Indian	Married	Secondary	Working	B 40	Never smoked	Never drinked	Inactive	No	Yes	Yes	No	No	0	No	20	No dependency	8	No dependency	No	0	No injuries	Not treated	Not applicable	28.33	12	7.7	No sarcopenia
62	60-74	Male	Petaling	Malay	Married	Primary or less	Working	B 40	Never smoked	Never drinked	Inactive	No	Yes	Yes	No	No	0	No	20	No dependency	8	No dependency	No	0	No injuries	Not treated	Not applicable	28.33	11	7.8	No sarcopenia
63	60-74	Male	Kuala Langat	Chinese	Married	Primary or less	Working	B 40	Active smoker	Alcohol drinker	Inactive	No	No	No	No	No	0	No	19	Dependency	8	No dependency	No	0	No injuries	Not treated	Not applicable	28.33	11	7.2	No sarcopenia
64	60-74	Male	Petaling	Chinese	Married	Tertiary	Retired	B 40	Never smoked	Alcohol drinker	Inactive	No	No	Yes	Yes	No	0	No	20	No dependency	8	No dependency	No	0	No injuries	Not treated	Not applicable	28.33	11	7.3	No sarcopenia
65	60-74	Male	Petaling	Indian	Married	Secondary	Retired	B 40	Never smoked	Alcohol drinker	Active	No	No	Yes	No	No	0	No	20	No dependency	8	No dependency	No	0	No injuries	Not treated	Not applicable	28.33	8	7.2	No sarcopenia
66	>75	Male	Petaling	Indian	Married	Secondary	Not employed	B 40	Never smoked	Alcohol drinker	Inactive	Yes	Yes	Yes	Yes	No	2	Yes	17	Dependency	3	Dependency	No	0	No injuries	Not treated	Not applicable	28.67	12	7.8	No sarcopenia
67	60-74	Male	Kuala Langat	Malay	Married	Secondary	Not employed	B 40	Never smoked	Never drinked	Inactive	No	Yes	No	Yes	No	0	No	20	No dependency	8	No dependency	No	0	No injuries	Not treated	Not applicable	28.67	11	7.4	No sarcopenia
68	60-74	Male	Kuala Langat	Malay	Married	Tertiary	Retired	B 40	Active smoker	Never drinked	Active	Yes	Yes	Yes	No	Yes	0	No	20	No dependency	8	No dependency	No	0	No injuries	Not treated	Not applicable	28.67	10	8.2	No sarcopenia
69	60-74	Female	Kuala Langat	Chinese	Married	Primary or less	Housewife	B 40	Never smoked	Never drinked	Inactive	No	Yes	No	No	No	0	No	20	No dependency	8	No dependency	No	0	No injuries	Not treated	Not applicable	28.67	10	7	No sarcopenia
70	60-74	Male	Petaling	Malay	Married	Secondary	Retired	B 40	Ex-smoker	Never drinked	Inactive	No	No	No	No	No	0	No	20	No dependency	8	No dependency	No	0	No injuries	Not treated	Not applicable	28.67	9	8	No sarcopenia
71	60-74	Male	Kuala Langat	Malay	Married	Tertiary	Retired	B 40	Never smoked	Never drinked	Active	No	Yes	Yes	No	No	1	No	20	No dependency	8	No dependency	No	0	No injuries	Not treated	Not applicable	28.67	7	8.4	No sarcopenia
72	60-74	Male	Kuala Langat	Indian	Married	Secondary	Not employed	B 40	Never smoked	Never drinked	Active	No	No	Yes	No	No	0	No	20	No dependency	8	No dependency	No	0	No injuries	Not treated	Not applicable	30	12	7.1	No sarcopenia
73	60-74	Male	Petaling	Malay	Married	Secondary	Working	B 40	Never smoked	Never drinked	Active	No	No	Yes	No	No	0	No	20	No dependency	8	No dependency	No	0	No injuries	Not treated	Not applicable	30	12	7.9	No sarcopenia
74	60-74	Male	Petaling	Chinese	Married	Tertiary	Retired	B 40	Never smoked	Alcohol drinker	Inactive	No	No	Yes	Yes	No	0	No	20	No dependency	8	No dependency	No	0	No injuries	Not treated	Not applicable	30	6	7.3	No sarcopenia
75	60-74	Male	Kuala Langat	Indian	Married	Primary or less	Retired	B 40	Never smoked	Alcohol drinker	Active	Yes	Yes	Yes	No	No	2	Yes	20	No dependency	8	No dependency	No	0	No injuries	Not treated	Not applicable	30.33	11	8.3	No sarcopenia
76	60-74	Male	Kuala Langat	Malay	Married	Tertiary	Working	B 40	Never smoked	Never drinked	Inactive	No	Yes	No	No	No	0	No	20	No dependency	8	No dependency	Yes	1	Minor injury	Self treated	Outside the house	30.33	10	7.5	No sarcopenia
77	>75	Female	Kuala Langat	Chinese	Married	Primary or less	Housewife	B 40	Never smoked	Never drinked	Inactive	No	Yes	Yes	No	No	0	No	20	No dependency	8	No dependency	No	0	No injuries	Not treated	Not applicable	31	10	7.2	No sarcopenia
78	60-74	Male	Petaling	Malay	Married	Secondary	Retired	B 40	Ex-smoker	Never drinked	Inactive	Yes	Yes	Yes	Yes	No	0	No	20	No dependency	8	No dependency	Yes	1	Minor injury	Self treated	Inside the house	31.33	12	7.6	No sarcopenia
79	60-74	Male	Kuala Langat	Malay	Single	Primary or less	Not employed	B 40	Active smoker	Never drinked	Inactive	Yes	Yes	Yes	No	No	0	No	20	No dependency	8	No dependency	No	0	No injuries	Not treated	Not applicable	31.33	12	7	No sarcopenia
80	60-74	Male	Kuala Langat	Chinese	Married	Secondary	Working	B 40	Never smoked	Alcohol drinker	Inactive	No	Yes	Yes	No	No	0	No	20	No dependency	8	No dependency	No	0	No injuries	Not treated	Not applicable	31.33	10	8.2	No sarcopenia
81	60-74	Male	Petaling	Chinese	Single	Secondary	Not employed	B 40	Never smoked	Never drinked	Inactive	No	No	Yes	No	No	0	No	20	No dependency	8	No dependency	No	0	No injuries	Not treated	Not applicable	31.67	12	8.4	No sarcopenia
82	>75	Male	Kuala Langat	Malay	Married	Primary or less	Not employed	B 40	Never smoked	Never drinked	Active	No	No	No	No	No	0	No	20	No dependency	8	No dependency	No	0	No injuries	Not treated	Not applicable	31.67	12	8.1	No sarcopenia
83	60-74	Male	Kuala Langat	Chinese	Married	Secondary	Working	B 40	Never smoked	Alcohol drinker	Inactive	No	No	No	No	No	0	No	20	No dependency	8	No dependency	Yes	1	Minor injury	Self treated	House yard	31.67	9	7.7	No sarcopenia
84	>75	Male	Kuala Langat	Chinese	Married	Primary or less	Not employed	B 40	Active smoker	Never drinked	Inactive	No	Yes	Yes	No	No	0	No	20	No dependency	8	No dependency	No	0	No injuries	Not treated	Not applicable	32	12	7.6	No sarcopenia
85	60-74	Male	Kuala Langat	Indian	Married	Secondary	Working	B 40	Active smoker	Alcohol drinker	Inactive	No	Yes	Yes	No	No	0	No	20	No dependency	8	No dependency	No	0	No injuries	Not treated	Not applicable	32.33	8	7.9	No sarcopenia
86	60-74	Male	Kuala Langat	Chinese	Married	Secondary	Not employed	B 40	Never smoked	Never drinked	Inactive	No	No	No	No	No	0	No	20	No dependency	8	No dependency	No	0	No injuries	Not treated	Not applicable	32.33	8	7.9	No sarcopenia
87	60-74	Male	Kuala Langat	Indian	Married	Secondary	Working	B 40	Never smoked	Alcohol drinker	Inactive	Yes	Yes	Yes	Yes	No	0	No	20	No dependency	8	No dependency	No	0	No injuries	Not treated	Not applicable	32.67	10	10.2	No sarcopenia
88	60-74	Male	Kuala Langat	Indian	Married	Secondary	Working	B 40	Never smoked	Alcohol drinker	Active	Yes	Yes	Yes	Yes	No	0	No	19	Dependency	8	No dependency	No	0	No injuries	Not treated	Not applicable	32.67	7	8.3	No sarcopenia
89	60-74	Male	Kuala Langat	Malay	Married	Secondary	Working	B 40	Never smoked	Never drinked	Inactive	No	No	No	No	No	0	No	20	No dependency	8	No dependency	No	0	No injuries	Not treated	Not applicable	33	12	9.9	No sarcopenia
90	60-74	Male	Petaling	Indian	Married	Primary or less	Not employed	B 40	Never smoked	Never drinked	Inactive	Yes	Yes	Yes	Yes	No	2	Yes	20	No dependency	8	No dependency	No	0	No injuries	Not treated	Not applicable	33	11	8.4	No sarcopenia
91	60-74	Male	Kuala Langat	Malay	Married	Secondary	Retired	B 40	Active smoker	Never drinked	Inactive	Yes	Yes	Yes	No	No	0	No	20	No dependency	8	No dependency	No	0	No injuries	Not treated	Not applicable	33.33	11	9.9	No sarcopenia
92	>75	Male	Petaling	Indian	Married	Secondary	Retired	B 40	Never smoked	Alcohol drinker	Inactive	No	Yes	No	No	No	2	Yes	17	Dependency	8	No dependency	No	0	No injuries	Not treated	Not applicable	33.33	11	7.2	No sarcopenia
93	60-74	Male	Petaling	Chinese	Married	Tertiary	Working	T 20	Never smoked	Alcohol drinker	Active	No	Yes	Yes	No	No	0	No	20	No dependency	8	No dependency	No	0	No injuries	Not treated	Not applicable	33.33	8	8.5	No sarcopenia
94	60-74	Male	Petaling	Malay	Married	Primary or less	Working	B 40	Never smoked	Never drinked	Inactive	No	Yes	Yes	No	No	0	No	20	No dependency	8	No dependency	Yes	1	Severe injury	Admitted to hospital	House yard	33.67	12	8.4	No sarcopenia
95	60-74	Male	Kuala Langat	Malay	Married	Primary or less	Retired	B 40	Active smoker	Never drinked	Active	No	No	No	No	No	0	No	20	No dependency	8	No dependency	No	0	No injuries	Not treated	Not applicable	33.67	11	7.9	No sarcopenia
96	>75	Male	Kuala Langat	Chinese	Married	Primary or less	Not employed	B 40	Never smoked	Never drinked	Inactive	No	No	Yes	No	No	0	No	20	No dependency	8	No dependency	No	0	No injuries	Not treated	Not applicable	33.67	8	8	No sarcopenia
97	>75	Male	Petaling	Indian	Married	Secondary	Not employed	B 40	Never smoked	Alcohol drinker	Inactive	No	Yes	Yes	No	No	0	No	20	No dependency	8	No dependency	No	0	No injuries	Not treated	Not applicable	34	7	7.6	No sarcopenia
98	60-74	Male	Petaling	Indian	Married	Primary or less	Not employed	B 40	Never smoked	Never drinked	Inactive	No	Yes	Yes	No	Yes	0	No	20	No dependency	8	No dependency	No	0	No injuries	Not treated	Not applicable	34.33	12	9.1	No sarcopenia
99	60-74	Male	Kuala Langat	Indian	Married	Secondary	Working	B 40	Never smoked	Alcohol drinker	Inactive	No	Yes	Yes	No	No	0	No	20	No dependency	8	No dependency	No	0	No injuries	Not treated	Not applicable	34.33	11	7.2	No sarcopenia
100	60-74	Male	Petaling	Malay	Married	Primary or less	Working	B 40	Never smoked	Never drinked	Inactive	No	Yes	Yes	No	No	0	No	20	No dependency	8	No dependency	No	0	No injuries	Not treated	Not applicable	34.33	10	8.6	No sarcopenia
101	60-74	Male	Kuala Langat	Indian	Married	Primary or less	Working	B 40	Never smoked	Never drinked	Inactive	No	Yes	Yes	Yes	No	0	No	20	No dependency	8	No dependency	No	0	No injuries	Not treated	Not applicable	34.33	10	8.1	No sarcopenia
102	60-74	Male	Kuala Langat	Malay	Married	Primary or less	Not employed	B 40	Active smoker	Never drinked	Inactive	No	No	No	No	No	0	No	20	No dependency	8	No dependency	No	0	No injuries	Not treated	Not applicable	34.67	12	7.3	No sarcopenia
103	60-74	Male	Kuala Langat	Malay	Married	Tertiary	Retired	B 40	Ex-smoker	Never drinked	Active	Yes	No	No	No	No	0	No	20	No dependency	8	No dependency	No	0	No injuries	Not treated	Not applicable	34.67	9	7.5	No sarcopenia
104	60-74	Male	Kuala Langat	Malay	Married	Tertiary	Working	B 40	Never smoked	Never drinked	Active	No	No	Yes	No	No	0	No	20	No dependency	8	No dependency	No	0	No injuries	Not treated	Not applicable	35	12	8.2	No sarcopenia
105	60-74	Male	Kuala Langat	Malay	Widowed or divorced	Primary or less	Working	B 40	Ex-smoker	Never drinked	Inactive	Yes	Yes	Yes	No	No	0	No	20	No dependency	8	No dependency	No	0	No injuries	Not treated	Not applicable	35.67	12	7.3	No sarcopenia
106	60-74	Male	Kuala Langat	Malay	Married	Secondary	Retired	B 40	Never smoked	Never drinked	Inactive	No	Yes	No	Yes	No	0	No	20	No dependency	8	No dependency	No	0	No injuries	Not treated	Not applicable	35.67	11	7.4	No sarcopenia
107	60-74	Male	Kuala Langat	Malay	Married	Primary or less	Working	B 40	Active smoker	Never drinked	Active	No	No	No	No	No	0	No	20	No dependency	8	No dependency	No	0	No injuries	Not treated	Not applicable	36	10	7.4	No sarcopenia
108	60-74	Male	Kuala Langat	Indian	Married	Secondary	Working	B 40	Never smoked	Alcohol drinker	Active	No	No	Yes	Yes	No	0	No	20	No dependency	8	No dependency	No	0	No injuries	Not treated	Not applicable	36.67	12	7.7	No sarcopenia
109	60-74	Male	Kuala Langat	Indian	Married	Secondary	Working	M 40	Never smoked	Alcohol drinker	Active	Yes	No	Yes	No	No	0	No	20	No dependency	8	No dependency	No	0	No injuries	Not treated	Not applicable	36.67	12	7.2	No sarcopenia
110	60-74	Male	Kuala Langat	Indian	Married	Tertiary	Retired	B 40	Never smoked	Never drinked	Active	No	No	No	No	No	0	No	20	No dependency	8	No dependency	No	0	No injuries	Not treated	Not applicable	37	11	7.4	No sarcopenia
111	60-74	Male	Kuala Langat	Indian	Married	Secondary	Working	B 40	Never smoked	Alcohol drinker	Inactive	Yes	Yes	No	No	No	0	No	20	No dependency	8	No dependency	No	0	No injuries	Not treated	Not applicable	37	9	9	No sarcopenia
112	60-74	Male	Kuala Langat	Malay	Married	Secondary	Not employed	B 40	Active smoker	Never drinked	Active	Yes	Yes	Yes	No	No	2	Yes	20	No dependency	8	No dependency	No	0	No injuries	Not treated	Not applicable	37.33	12	7.3	No sarcopenia
113	60-74	Male	Kuala Langat	Malay	Married	Secondary	Retired	B 40	Ex-smoker	Never drinked	Inactive	No	Yes	Yes	No	No	0	No	20	No dependency	8	No dependency	No	0	No injuries	Not treated	Not applicable	37.67	10	8.1	No sarcopenia
114	60-74	Male	Kuala Langat	Malay	Married	Primary or less	Not employed	B 40	Ex-smoker	Never drinked	Inactive	Yes	Yes	Yes	No	No	0	No	20	No dependency	7	Dependency	Yes	1	Minor injury	Outpatient	Bathroom/toilet	38	9	8.9	No sarcopenia
115	60-74	Male	Kuala Langat	Indian	Married	Secondary	Working	B 40	Never smoked	Alcohol drinker	Inactive	No	Yes	No	No	No	0	No	20	No dependency	8	No dependency	No	0	No injuries	Not treated	Not applicable	38.67	12	7.7	No sarcopenia
116	60-74	Male	Kuala Langat	Malay	Married	Primary or less	Working	B 40	Never smoked	Never drinked	Active	Yes	Yes	Yes	No	No	0	No	20	No dependency	8	No dependency	No	0	No injuries	Not treated	Not applicable	38.67	12	7.9	No sarcopenia
117	60-74	Male	Kuala Langat	Indian	Married	Tertiary	Working	B 40	Never smoked	Never drinked	Active	No	Yes	No	No	No	0	No	20	No dependency	8	No dependency	No	0	No injuries	Not treated	Not applicable	38.67	12	7.9	No sarcopenia
118	>75	Male	Kuala Langat	Malay	Married	Primary or less	Working	B 40	Never smoked	Never drinked	Inactive	No	No	Yes	No	No	0	No	20	No dependency	8	No dependency	No	0	No injuries	Not treated	Not applicable	39	12	9.3	No sarcopenia
119	60-74	Male	Petaling	Indian	Married	Primary or less	Not employed	B 40	Never smoked	Never drinked	Inactive	Yes	No	Yes	Yes	No	0	No	20	No dependency	8	No dependency	Yes	1	Severe injury	Outpatient	Inside the house	39.33	9	7.7	No sarcopenia
120	60-74	Male	Kuala Langat	Malay	Married	Primary or less	Working	B 40	Active smoker	Never drinked	Inactive	No	Yes	No	No	No	0	No	20	No dependency	8	No dependency	No	0	No injuries	Not treated	Not applicable	40	12	8.3	No sarcopenia
121	60-74	Male	Kuala Langat	Chinese	Married	Secondary	Working	B 40	Active smoker	Alcohol drinker	Inactive	No	Yes	No	No	No	0	No	20	No dependency	8	No dependency	No	0	No injuries	Not treated	Not applicable	40.67	10	8	No sarcopenia
122	>75	Male	Kuala Langat	Chinese	Married	Primary or less	Not employed	B 40	Active smoker	Alcohol drinker	Inactive	No	No	Yes	No	No	0	No	20	No dependency	8	No dependency	Yes	2	Minor injury	Admitted to hospital	Inside the house	41	12	7.8	No sarcopenia
123	60-74	Male	Petaling	Indian	Married	Primary or less	Not employed	B 40	Ex-smoker	Never drinked	Inactive	No	Yes	No	No	No	0	No	20	No dependency	8	No dependency	No	0	No injuries	Not treated	Not applicable	41.33	10	7.2	No sarcopenia
124	60-74	Male	Kuala Langat	Indian	Married	Tertiary	Retired	M 40	Ex-smoker	Alcohol drinker	Active	No	Yes	Yes	Yes	No	0	No	20	No dependency	8	No dependency	No	0	No injuries	Not treated	Not applicable	41.67	10	8.5	No sarcopenia
125	60-74	Male	Kuala Langat	Chinese	Married	Secondary	Not employed	B 40	Never smoked	Never drinked	Inactive	No	No	Yes	No	No	1	No	20	No dependency	8	No dependency	No	0	No injuries	Not treated	Not applicable	42	9	8.7	No sarcopenia
126	60-74	Male	Kuala Langat	Malay	Married	Secondary	Not employed	B 40	Never smoked	Never drinked	Active	No	Yes	Yes	No	No	0	No	20	No dependency	8	No dependency	Yes	1	Minor injury	Outpatient	Outside the house	42.33	11	7.8	No sarcopenia
127	60-74	Male	Kuala Langat	Malay	Married	Secondary	Retired	B 40	Never smoked	Never drinked	Active	No	No	Yes	No	No	0	No	20	No dependency	8	No dependency	No	0	No injuries	Not treated	Not applicable	44.33	8	7.3	No sarcopenia
128	60-74	Female	Petaling	Indian	Widowed or divorced	Primary or less	Working	B 40	Never smoked	Never drinked	Active	Yes	Yes	Yes	Yes	No	0	No	20	No dependency	6	Dependency	Yes	1	Minor injury	Self treated	House yard	9.67	42	6.5	Possible sarcopenia
129	60-74	Female	Petaling	Malay	Married	Primary or less	Housewife	B 40	Never smoked	Never drinked	Inactive	Yes	No	Yes	No	No	0	No	20	No dependency	6	Dependency	Yes	1	Minor injury	Self treated	Outside the house	10	29	5.8	Possible sarcopenia
130	60-74	Female	Kuala Langat	Chinese	Married	Primary or less	Housewife	B 40	Never smoked	Alcohol drinker	Inactive	Yes	No	No	No	No	0	No	20	No dependency	8	No dependency	No	0	No injuries	Not treated	Not applicable	10.33	16	6.1	Possible sarcopenia
131	60-74	Female	Kuala Langat	Chinese	Married	Primary or less	Housewife	B 40	Never smoked	Alcohol drinker	Inactive	No	No	Yes	No	No	0	No	20	No dependency	8	No dependency	Yes	4	Minor injury	Outpatient	Bathroom/toilet	10.33	15	6	Possible sarcopenia
132	>75	Female	Kuala Langat	Indian	Married	Primary or less	Housewife	M 40	Never smoked	Never drinked	Inactive	Yes	Yes	Yes	No	Yes	0	No	18	Dependency	5	Dependency	Yes	3	Minor injury	Self treated	Inside the house	10.67	16	6.2	Possible sarcopenia
133	60-74	Female	Kuala Langat	Indian	Married	Secondary	Housewife	B 40	Never smoked	Never drinked	Active	Yes	Yes	Yes	No	No	0	No	20	No dependency	8	No dependency	No	0	No injuries	Not treated	Not applicable	11.33	12	6.4	Possible sarcopenia
134	60-74	Female	Kuala Langat	Chinese	Married	Primary or less	Housewife	B 40	Never smoked	Never drinked	Inactive	No	No	Yes	No	No	0	No	20	No dependency	8	No dependency	No	0	No injuries	Not treated	Not applicable	12	9	5.9	Possible sarcopenia
135	>75	Female	Petaling	Chinese	Widowed or divorced	Primary or less	Housewife	B 40	Never smoked	Alcohol drinker	Inactive	Yes	Yes	Yes	No	No	0	No	20	No dependency	8	No dependency	No	0	No injuries	Not treated	Not applicable	12.33	20	6.1	Possible sarcopenia
136	60-74	Female	Petaling	Indian	Married	Primary or less	Housewife	B 40	Never smoked	Never drinked	Active	Yes	Yes	Yes	No	Yes	2	Yes	19	Dependency	7	Dependency	Yes	2	Minor injury	Self treated	Inside the house	12.67	17	6.1	Possible sarcopenia
137	>75	Female	Kuala Langat	Chinese	Married	Primary or less	Housewife	B 40	Never smoked	Never drinked	Active	No	Yes	Yes	No	No	0	No	20	No dependency	8	No dependency	Yes	1	Minor injury	Outpatient	Bathroom/toilet	12.67	14	6.2	Possible sarcopenia
138	60-74	Male	Kuala Langat	Chinese	Married	Secondary	Not employed	B 40	Never smoked	Never drinked	Active	No	Yes	No	No	No	0	No	20	No dependency	8	No dependency	No	0	No injuries	Not treated	Not applicable	12.67	10	9.1	Possible sarcopenia
139	60-74	Female	Petaling	Malay	Married	Secondary	Housewife	B 40	Never smoked	Never drinked	Active	No	No	No	No	No	0	No	20	No dependency	8	No dependency	Yes	2	Minor injury	Outpatient	Outside the house	13	16	7	Possible sarcopenia
140	60-74	Female	Kuala Langat	Malay	Married	Secondary	Housewife	B 40	Never smoked	Never drinked	Inactive	Yes	Yes	Yes	No	No	0	No	20	No dependency	8	No dependency	No	0	No injuries	Not treated	Not applicable	13	14	7.2	Possible sarcopenia
141	60-74	Female	Kuala Langat	Chinese	Married	Secondary	Housewife	B 40	Never smoked	Never drinked	Active	No	No	No	No	No	0	No	20	No dependency	8	No dependency	No	0	No injuries	Not treated	Not applicable	13	8	6.2	Possible sarcopenia
142	60-74	Female	Petaling	Malay	Married	Secondary	Housewife	B 40	Never smoked	Never drinked	Inactive	Yes	Yes	Yes	No	No	0	No	20	No dependency	8	No dependency	No	0	No injuries	Not treated	Not applicable	13.33	21	7.5	Possible sarcopenia
143	>75	Female	Kuala Langat	Malay	Married	Primary or less	Housewife	B 40	Never smoked	Never drinked	Inactive	No	No	Yes	No	No	0	No	20	No dependency	8	No dependency	Yes	1	Minor injury	Self treated	House yard	13.33	14	5.8	Possible sarcopenia
144	60-74	Female	Kuala Langat	Chinese	Married	Primary or less	Housewife	B 40	Never smoked	Never drinked	Inactive	No	No	No	No	No	0	No	20	No dependency	8	No dependency	Yes	1	Minor injury	Outpatient	Inside the house	13.33	14	5.8	Possible sarcopenia
145	>75	Female	Kuala Langat	Indian	Married	Primary or less	Housewife	B 40	Never smoked	Never drinked	Inactive	Yes	Yes	Yes	No	No	1	No	20	No dependency	5	Dependency	Yes	1	Minor injury	Self treated	Inside the house	13.67	21	5.7	Possible sarcopenia
146	60-74	Female	Kuala Langat	Chinese	Married	Primary or less	Housewife	B 40	Never smoked	Alcohol drinker	Inactive	No	No	Yes	No	No	0	No	20	No dependency	8	No dependency	No	0	No injuries	Not treated	Not applicable	13.67	19	6.1	Possible sarcopenia
147	60-74	Female	Kuala Langat	Chinese	Married	Primary or less	Housewife	B 40	Never smoked	Alcohol drinker	Inactive	Yes	Yes	Yes	No	No	0	No	20	No dependency	8	No dependency	No	0	No injuries	Not treated	Not applicable	13.67	18	5.8	Possible sarcopenia
148	60-74	Female	Petaling	Malay	Married	Primary or less	Housewife	B 40	Never smoked	Never drinked	Inactive	No	Yes	Yes	No	No	0	No	20	No dependency	8	No dependency	Yes	1	Minor injury	Self treated	Inside the house	13.67	13	5.9	Possible sarcopenia
149	60-74	Female	Petaling	Malay	Married	Tertiary	Working	B 40	Never smoked	Never drinked	Inactive	Yes	Yes	Yes	No	No	0	No	20	No dependency	8	No dependency	No	0	No injuries	Not treated	Not applicable	14	20	7.9	Possible sarcopenia
150	60-74	Male	Petaling	Malay	Married	Primary or less	Not employed	B 40	Ex-smoker	Never drinked	Inactive	Yes	Yes	Yes	Yes	No	0	No	20	No dependency	8	No dependency	No	0	No injuries	Not treated	Not applicable	14	19	8.3	Possible sarcopenia
151	60-74	Female	Petaling	Malay	Married	Primary or less	Housewife	B 40	Never smoked	Never drinked	Inactive	No	No	No	No	No	0	No	20	No dependency	8	No dependency	Yes	1	Minor injury	Self treated	House yard	14	17	6.9	Possible sarcopenia
152	60-74	Female	Kuala Langat	Chinese	Married	Primary or less	Housewife	B 40	Never smoked	Alcohol drinker	Inactive	Yes	Yes	No	No	No	0	No	20	No dependency	8	No dependency	Yes	1	Severe injury	Admitted to hospital	Inside the house	14	17	6.4	Possible sarcopenia
153	60-74	Female	Kuala Langat	Chinese	Married	Primary or less	Housewife	B 40	Never smoked	Alcohol drinker	Inactive	Yes	Yes	Yes	No	Yes	0	No	19	Dependency	7	Dependency	Yes	1	Severe injury	Admitted to hospital	Inside the house	14	10	5.8	Possible sarcopenia
154	60-74	Female	Petaling	Malay	Married	Secondary	Housewife	B 40	Never smoked	Never drinked	Inactive	No	Yes	Yes	No	No	0	No	20	No dependency	8	No dependency	Yes	1	Minor injury	Self treated	Inside the house	14.33	31	6.9	Possible sarcopenia
155	60-74	Female	Petaling	Indian	Married	Primary or less	Housewife	B 40	Never smoked	Never drinked	Inactive	No	Yes	Yes	No	No	0	No	19	Dependency	8	No dependency	No	0	No injuries	Not treated	Not applicable	14.33	16	6.1	Possible sarcopenia
156	60-74	Female	Kuala Langat	Indian	Married	Primary or less	Housewife	B 40	Never smoked	Never drinked	Inactive	Yes	Yes	No	No	No	0	No	20	No dependency	8	No dependency	No	0	No injuries	Not treated	Not applicable	14.33	16	6	Possible sarcopenia
157	60-74	Female	Petaling	Chinese	Married	Primary or less	Housewife	B 40	Never smoked	Alcohol drinker	Inactive	No	Yes	No	No	No	0	No	20	No dependency	8	No dependency	No	0	No injuries	Not treated	Not applicable	14.33	7	6.7	Possible sarcopenia
158	60-74	Female	Petaling	Indian	Married	Primary or less	Housewife	B 40	Never smoked	Never drinked	Inactive	No	Yes	No	Yes	No	0	No	20	No dependency	8	No dependency	No	0	No injuries	Not treated	Not applicable	14.67	20	6	Possible sarcopenia
159	>75	Female	Petaling	Chinese	Married	Primary or less	Housewife	B 40	Never smoked	Alcohol drinker	Inactive	No	Yes	No	No	No	0	No	17	Dependency	4	Dependency	Yes	1	Minor injury	Self treated	House yard	14.67	18	6	Possible sarcopenia
160	60-74	Female	Kuala Langat	Malay	Married	Secondary	Housewife	B 40	Never smoked	Never drinked	Inactive	Yes	Yes	Yes	No	No	0	No	20	No dependency	7	Dependency	Yes	1	Minor injury	Outpatient	Bathroom/toilet	14.67	13	5.7	Possible sarcopenia
161	60-74	Female	Petaling	Malay	Married	Primary or less	Housewife	B 40	Never smoked	Never drinked	Inactive	No	Yes	Yes	No	No	0	No	20	No dependency	7	Dependency	Yes	1	Minor injury	Self treated	Inside the house	15	32	7.3	Possible sarcopenia
162	60-74	Female	Kuala Langat	Chinese	Married	Primary or less	Housewife	B 40	Never smoked	Alcohol drinker	Inactive	No	Yes	Yes	No	No	0	No	20	No dependency	8	No dependency	No	0	No injuries	Not treated	Not applicable	15	11	6.3	Possible sarcopenia
163	60-74	Female	Kuala Langat	Chinese	Married	Secondary	Housewife	B 40	Never smoked	Alcohol drinker	Inactive	Yes	Yes	Yes	No	No	0	No	20	No dependency	8	No dependency	Yes	1	Minor injury	Self treated	Inside the house	15	9	6.9	Possible sarcopenia
164	>75	Male	Kuala Langat	Malay	Married	Secondary	Not employed	B 40	Ex-smoker	Never drinked	Inactive	Yes	Yes	Yes	No	No	0	No	20	No dependency	8	No dependency	No	0	No injuries	Not treated	Not applicable	15.33	26	7.5	Possible sarcopenia
165	60-74	Female	Petaling	Indian	Married	Secondary	Housewife	B 40	Never smoked	Never drinked	Inactive	No	Yes	No	No	No	0	No	20	No dependency	8	No dependency	Yes	3	Minor injury	Self treated	Bathroom/toilet	15.33	20	6	Possible sarcopenia
166	60-74	Female	Petaling	Indian	Married	Secondary	Housewife	B 40	Never smoked	Never drinked	Inactive	No	No	No	No	No	0	No	20	No dependency	8	No dependency	Yes	1	Minor injury	Self treated	Inside the house	15.33	18	7.2	Possible sarcopenia
167	>75	Female	Petaling	Malay	Married	Secondary	Housewife	B 40	Never smoked	Never drinked	Active	Yes	Yes	Yes	No	No	0	No	20	No dependency	8	No dependency	Yes	1	Minor injury	Self treated	House yard	15.33	14	7.1	Possible sarcopenia
168	>75	Female	Kuala Langat	Chinese	Married	Primary or less	Housewife	B 40	Never smoked	Alcohol drinker	Inactive	Yes	Yes	No	No	No	2	Yes	20	No dependency	3	Dependency	No	0	No injuries	Not treated	Not applicable	15.33	14	5.8	Possible sarcopenia
169	60-74	Female	Kuala Langat	Chinese	Married	Primary or less	Housewife	B 40	Never smoked	Alcohol drinker	Inactive	No	Yes	No	No	No	0	No	20	No dependency	8	No dependency	No	0	No injuries	Not treated	Not applicable	15.33	12	6.1	Possible sarcopenia
170	60-74	Female	Petaling	Malay	Married	Primary or less	Housewife	B 40	Never smoked	Never drinked	Active	No	No	No	No	No	0	No	20	No dependency	8	No dependency	No	0	No injuries	Not treated	Not applicable	15.33	12	6.3	Possible sarcopenia
171	>75	Male	Kuala Langat	Chinese	Married	Primary or less	Not employed	B 40	Never smoked	Alcohol drinker	Inactive	No	Yes	No	No	No	0	No	19	Dependency	6	Dependency	No	0	No injuries	Not treated	Not applicable	15.33	12	7.4	Possible sarcopenia
172	60-74	Female	Kuala Langat	Indian	Married	Primary or less	Housewife	B 40	Never smoked	Never drinked	Inactive	Yes	Yes	Yes	Yes	No	0	No	20	No dependency	8	No dependency	Yes	1	Minor injury	Self treated	House yard	15.7	13	7.5	Possible sarcopenia
173	60-74	Female	Kuala Langat	Chinese	Married	Primary or less	Working	B 40	Never smoked	Alcohol drinker	Inactive	Yes	Yes	No	No	No	0	No	20	No dependency	8	No dependency	Yes	1	Minor injury	Self treated	Inside the house	15.7	12	6	Possible sarcopenia
174	60-74	Female	Petaling	Indian	Married	Secondary	Housewife	B 40	Never smoked	Never drinked	Inactive	No	No	Yes	No	No	0	No	20	No dependency	8	No dependency	Yes	1	Minor injury	Self treated	House yard	16	20	6.2	Possible sarcopenia
175	60-74	Female	Petaling	Indian	Married	Primary or less	Housewife	B 40	Never smoked	Never drinked	Inactive	No	No	No	No	No	0	No	20	No dependency	6	Dependency	No	0	No injuries	Not treated	Not applicable	16	16	7	Possible sarcopenia
176	60-74	Female	Kuala Langat	Malay	Single	Primary or less	Working	B 40	Never smoked	Never drinked	Inactive	Yes	Yes	Yes	No	No	0	No	20	No dependency	8	No dependency	Yes	1	Minor injury	Outpatient	Inside the house	16	15	6	Possible sarcopenia
177	60-74	Female	Kuala Langat	Malay	Married	Primary or less	Housewife	B 40	Never smoked	Never drinked	Active	Yes	Yes	Yes	No	No	0	No	20	No dependency	8	No dependency	No	0	No injuries	Not treated	Not applicable	16	15	6.5	Possible sarcopenia
178	60-74	Female	Petaling	Chinese	Married	Primary or less	Housewife	B 40	Never smoked	Alcohol drinker	Inactive	No	Yes	Yes	No	Yes	0	No	20	No dependency	8	No dependency	Yes	1	Minor injury	Self treated	Inside the house	16	13	6.8	Possible sarcopenia
179	60-74	Female	Kuala Langat	Malay	Widowed or divorced	Primary or less	Housewife	B 40	Never smoked	Never drinked	Active	Yes	Yes	Yes	No	No	0	No	20	No dependency	8	No dependency	Yes	1	Minor injury	Outpatient	Inside the house	16	12	6.8	Possible sarcopenia
180	60-74	Female	Petaling	Indian	Married	Secondary	Housewife	B 40	Never smoked	Never drinked	Active	No	No	Yes	No	No	0	No	20	No dependency	8	No dependency	No	0	No injuries	Not treated	Not applicable	16	12	5.9	Possible sarcopenia
181	60-74	Female	Kuala Langat	Indian	Married	Secondary	Retired	B 40	Never smoked	Never drinked	Inactive	No	No	Yes	No	No	0	No	20	No dependency	8	No dependency	No	0	No injuries	Not treated	Not applicable	16	10	5.7	Possible sarcopenia
182	60-74	Female	Petaling	Malay	Widowed or divorced	Secondary	Housewife	B 40	Never smoked	Never drinked	Inactive	No	No	Yes	Yes	Yes	0	No	19	Dependency	6	Dependency	Yes	2	Severe injury	Admitted to hospital	Inside the house	16.33	21	9.1	Possible sarcopenia
183	60-74	Female	Kuala Langat	Chinese	Married	Primary or less	Housewife	B 40	Never smoked	Alcohol drinker	Inactive	No	Yes	Yes	No	No	0	No	20	No dependency	8	No dependency	Yes	2	Minor injury	Outpatient	Inside the house	16.33	20	6.4	Possible sarcopenia
184	60-74	Male	Kuala Langat	Malay	Married	Primary or less	Retired	B 40	Active smoker	Never drinked	Inactive	Yes	Yes	Yes	No	No	0	No	20	No dependency	8	No dependency	Yes	2	Minor injury	Self treated	Outside the house	16.33	15	9.2	Possible sarcopenia
185	60-74	Female	Petaling	Indian	Married	Secondary	Housewife	B 40	Never smoked	Never drinked	Inactive	Yes	Yes	No	No	No	0	No	20	No dependency	8	No dependency	No	0	No injuries	Not treated	Not applicable	16.67	18	6.6	Possible sarcopenia
186	>75	Female	Petaling	Chinese	Married	Primary or less	Housewife	B 40	Never smoked	Alcohol drinker	Active	No	No	Yes	No	No	0	No	20	No dependency	8	No dependency	No	0	No injuries	Not treated	Not applicable	16.67	18	5.9	Possible sarcopenia
187	60-74	Female	Petaling	Malay	Married	Secondary	Housewife	B 40	Never smoked	Never drinked	Inactive	Yes	Yes	Yes	No	No	0	No	20	No dependency	8	No dependency	No	0	No injuries	Not treated	Not applicable	16.67	16	6.7	Possible sarcopenia
188	60-74	Female	Kuala Langat	Indian	Married	Primary or less	Working	B 40	Never smoked	Never drinked	Inactive	Yes	No	No	No	No	0	No	20	No dependency	8	No dependency	Yes	2	Severe injury	Outpatient	Inside the house	16.67	14	6	Possible sarcopenia
189	60-74	Female	Kuala Langat	Chinese	Married	Primary or less	Housewife	B 40	Never smoked	Never drinked	Inactive	No	No	No	No	No	0	No	20	No dependency	8	No dependency	No	0	No injuries	Not treated	Not applicable	16.67	14	6.4	Possible sarcopenia
190	>75	Female	Kuala Langat	Malay	Married	Primary or less	Housewife	B 40	Never smoked	Never drinked	Inactive	No	No	Yes	No	No	0	No	19	Dependency	6	Dependency	No	0	No injuries	Not treated	Not applicable	16.67	12	5.7	Possible sarcopenia
191	60-74	Female	Petaling	Indian	Widowed or divorced	Primary or less	Housewife	B 40	Never smoked	Never drinked	Active	No	Yes	No	No	No	0	No	20	No dependency	8	No dependency	No	0	No injuries	Not treated	Not applicable	17	24	7	Possible sarcopenia
192	60-74	Female	Petaling	Indian	Married	Primary or less	Housewife	B 40	Never smoked	Never drinked	Inactive	Yes	Yes	Yes	No	No	0	No	19	Dependency	7	Dependency	Yes	1	Severe injury	Admitted to hospital	House yard	17	19	6.3	Possible sarcopenia
193	60-74	Female	Petaling	Chinese	Married	Primary or less	Housewife	B 40	Never smoked	Alcohol drinker	Inactive	No	Yes	Yes	No	No	0	No	20	No dependency	6	Dependency	Yes	2	Minor injury	Self treated	Inside the house	17	15	7	Possible sarcopenia
194	60-74	Female	Kuala Langat	Malay	Married	Secondary	Housewife	B 40	Never smoked	Never drinked	Inactive	No	No	No	No	No	0	No	20	No dependency	8	No dependency	No	0	No injuries	Not treated	Not applicable	17	14	5.9	Possible sarcopenia
195	60-74	Female	Petaling	Indian	Married	Secondary	Housewife	B 40	Never smoked	Never drinked	Active	Yes	Yes	No	No	No	0	No	20	No dependency	8	No dependency	No	0	No injuries	Not treated	Not applicable	17.33	19	5.7	Possible sarcopenia
196	60-74	Female	Petaling	Indian	Married	Secondary	Housewife	B 40	Never smoked	Never drinked	Inactive	Yes	Yes	Yes	No	No	2	Yes	20	No dependency	7	Dependency	Yes	1	Minor injury	Self treated	House yard	17.33	18	6	Possible sarcopenia
197	>75	Female	Petaling	Malay	Married	Primary or less	Housewife	B 40	Never smoked	Never drinked	Inactive	Yes	Yes	Yes	No	No	2	Yes	20	No dependency	8	No dependency	Yes	1	Minor injury	Self treated	Bathroom/toilet	17.33	17	5.7	Possible sarcopenia
198	60-74	Female	Petaling	Malay	Single	Secondary	Working	B 40	Never smoked	Never drinked	Inactive	No	No	Yes	No	No	0	No	20	No dependency	8	No dependency	Yes	1	Minor injury	Self treated	Inside the house	17.33	13	5.7	Possible sarcopenia
199	>75	Female	Petaling	Malay	Married	Primary or less	Housewife	B 40	Never smoked	Never drinked	Inactive	Yes	Yes	Yes	No	No	0	No	19	Dependency	7	Dependency	No	0	No injuries	Not treated	Not applicable	17.33	12	7.9	Possible sarcopenia
200	>75	Male	Petaling	Indian	Married	Secondary	Not employed	B 40	Ex-smoker	Ex-drinker	Inactive	Yes	Yes	No	No	No	0	No	17	Dependency	4	Dependency	Yes	2	Minor injury	Self treated	Outside the house	17.33	11	7.4	Possible sarcopenia
201	60-74	Male	Kuala Langat	Malay	Married	Primary or less	Working	B 40	Active smoker	Never drinked	Active	No	Yes	Yes	No	No	0	No	20	No dependency	8	No dependency	No	0	No injuries	Not treated	Not applicable	17.33	10	7.6	Possible sarcopenia
202	60-74	Female	Petaling	Indian	Married	Secondary	Housewife	B 40	Never smoked	Never drinked	Active	Yes	Yes	Yes	No	No	0	No	20	No dependency	8	No dependency	No	0	No injuries	Not treated	Not applicable	17.67	25	6.2	Possible sarcopenia
203	>75	Female	Petaling	Chinese	Widowed or divorced	Secondary	Housewife	B 40	Never smoked	Never drinked	Inactive	Yes	Yes	Yes	No	No	0	No	19	Dependency	6	Dependency	No	0	No injuries	Not treated	Not applicable	17.67	15	8.6	Possible sarcopenia
204	60-74	Female	Petaling	Malay	Widowed or divorced	Primary or less	Housewife	B 40	Never smoked	Never drinked	Inactive	No	No	Yes	No	No	0	No	20	No dependency	8	No dependency	No	0	No injuries	Not treated	Not applicable	17.67	13	5.8	Possible sarcopenia
205	60-74	Female	Petaling	Indian	Married	Tertiary	Housewife	B 40	Never smoked	Never drinked	Inactive	Yes	Yes	Yes	No	No	0	No	20	No dependency	5	Dependency	Yes	1	Minor injury	Self treated	House yard	18.33	17	6.5	Possible sarcopenia
206	>75	Female	Petaling	Indian	Single	Secondary	Housewife	B 40	Never smoked	Never drinked	Inactive	No	Yes	Yes	No	No	0	No	19	Dependency	7	Dependency	No	0	No injuries	Not treated	Not applicable	18.33	13	6.6	Possible sarcopenia
207	60-74	Female	Petaling	Malay	Widowed or divorced	Primary or less	Housewife	B 40	Never smoked	Never drinked	Inactive	No	Yes	Yes	No	No	0	No	20	No dependency	8	No dependency	No	0	No injuries	Not treated	Not applicable	18.33	13	5.8	Possible sarcopenia
208	60-74	Male	Petaling	Malay	Married	Secondary	Retired	B 40	Ex-smoker	Never drinked	Inactive	No	Yes	Yes	Yes	No	0	No	20	No dependency	8	No dependency	No	0	No injuries	Not treated	Not applicable	19	26	7.1	Possible sarcopenia
209	60-74	Female	Petaling	Malay	Married	Secondary	Housewife	B 40	Never smoked	Never drinked	Inactive	No	No	No	No	No	0	No	20	No dependency	8	No dependency	Yes	2	Minor injury	Self treated	Inside the house	19	17	5.9	Possible sarcopenia
210	60-74	Male	Kuala Langat	Malay	Married	Primary or less	Not employed	B 40	Never smoked	Never drinked	Inactive	No	Yes	Yes	Yes	No	0	No	20	No dependency	8	No dependency	No	0	No injuries	Not treated	Not applicable	19	9	8	Possible sarcopenia
211	60-74	Female	Kuala Langat	Indian	Married	Secondary	Housewife	M 40	Never smoked	Never drinked	Active	Yes	Yes	Yes	No	No	0	No	19	Dependency	8	No dependency	No	0	No injuries	Not treated	Not applicable	19.33	21	6.5	Possible sarcopenia
212	60-74	Female	Kuala Langat	Chinese	Married	Primary or less	Housewife	B 40	Never smoked	Alcohol drinker	Inactive	No	Yes	No	No	No	0	No	20	No dependency	8	No dependency	No	0	No injuries	Not treated	Not applicable	19.33	18	5.9	Possible sarcopenia
213	60-74	Female	Kuala Langat	Malay	Married	Primary or less	Housewife	B 40	Never smoked	Never drinked	Inactive	No	No	No	No	No	0	No	20	No dependency	8	No dependency	Yes	2	Minor injury	Outpatient	House yard	19.33	15	6.5	Possible sarcopenia
214	60-74	Female	Petaling	Chinese	Married	Primary or less	Housewife	B 40	Never smoked	Never drinked	Active	No	No	Yes	No	No	0	No	20	No dependency	8	No dependency	No	0	No injuries	Not treated	Not applicable	19.33	14	6	Possible sarcopenia
215	60-74	Male	Petaling	Malay	Married	Primary or less	Working	B 40	Never smoked	Never drinked	Inactive	No	Yes	Yes	No	No	0	No	20	No dependency	8	No dependency	No	0	No injuries	Not treated	Not applicable	19.67	29	8.2	Possible sarcopenia
216	60-74	Female	Petaling	Chinese	Married	Primary or less	Housewife	B 40	Never smoked	Alcohol drinker	Inactive	Yes	Yes	No	No	No	0	No	20	No dependency	8	No dependency	Yes	1	Minor injury	Self treated	Inside the house	19.67	18	5.9	Possible sarcopenia
217	60-74	Female	Kuala Langat	Malay	Married	Primary or less	Working	B 40	Never smoked	Never drinked	Active	No	Yes	Yes	No	No	0	No	20	No dependency	8	No dependency	No	0	No injuries	Not treated	Not applicable	19.67	17	5.7	Possible sarcopenia
218	60-74	Female	Kuala Langat	Indian	Married	Primary or less	Housewife	B 40	Never smoked	Never drinked	Inactive	Yes	Yes	No	No	No	0	No	20	No dependency	8	No dependency	Yes	1	Minor injury	Self treated	Inside the house	19.67	16	6.6	Possible sarcopenia
219	>75	Male	Petaling	Chinese	Married	Primary or less	Not employed	B 40	Never smoked	Alcohol drinker	Inactive	No	Yes	No	No	No	2	Yes	17	Dependency	2	Dependency	No	0	No injuries	Not treated	Not applicable	19.67	8	7.8	Possible sarcopenia
220	60-74	Female	Petaling	Indian	Married	Primary or less	Housewife	B 40	Never smoked	Never drinked	Inactive	Yes	No	No	No	Yes	0	No	20	No dependency	7	Dependency	Yes	1	Severe injury	Admitted to hospital	Bathroom/toilet	20	20	7.1	Possible sarcopenia
221	60-74	Female	Petaling	Malay	Married	Primary or less	Housewife	B 40	Never smoked	Never drinked	Inactive	Yes	Yes	Yes	No	No	0	No	20	No dependency	8	No dependency	Yes	1	Minor injury	Self treated	Inside the house	20	16	7.8	Possible sarcopenia
222	60-74	Female	Petaling	Indian	Married	Secondary	Working	B 40	Never smoked	Never drinked	Inactive	No	No	No	No	No	0	No	20	No dependency	8	No dependency	Yes	1	Minor injury	Outpatient	Inside the house	20	15	6.5	Possible sarcopenia
223	60-74	Female	Petaling	Malay	Married	Primary or less	Housewife	B 40	Never smoked	Never drinked	Inactive	No	No	Yes	No	No	0	No	20	No dependency	8	No dependency	Yes	2	Minor injury	Self treated	Inside the house	20.33	13	5.9	Possible sarcopenia
224	60-74	Female	Petaling	Chinese	Widowed or divorced	Tertiary	Working	B 40	Never smoked	Never drinked	Inactive	No	Yes	Yes	No	No	0	No	20	No dependency	8	No dependency	Yes	1	Minor injury	Self treated	House yard	20.67	18	6.1	Possible sarcopenia
225	60-74	Female	Petaling	Indian	Married	Primary or less	Housewife	B 40	Never smoked	Never drinked	Inactive	No	Yes	No	No	No	0	No	20	No dependency	8	No dependency	No	0	No injuries	Not treated	Not applicable	20.67	18	7	Possible sarcopenia
226	>75	Female	Kuala Langat	Chinese	Married	Primary or less	Housewife	B 40	Never smoked	Alcohol drinker	Inactive	No	Yes	No	No	No	1	No	19	Dependency	8	No dependency	No	0	No injuries	Not treated	Not applicable	20.67	14	5.7	Possible sarcopenia
227	60-74	Male	Kuala Langat	Malay	Married	Primary or less	Working	B 40	Ex-smoker	Never drinked	Inactive	No	Yes	No	No	No	0	No	20	No dependency	8	No dependency	No	0	No injuries	Not treated	Not applicable	20.67	13	7.6	Possible sarcopenia
228	60-74	Male	Kuala Langat	Indian	Widowed or divorced	Tertiary	Working	B 40	Never smoked	Never drinked	Active	Yes	Yes	No	No	No	0	No	20	No dependency	8	No dependency	No	0	No injuries	Not treated	Not applicable	20.67	12	7.8	Possible sarcopenia
229	60-74	Female	Kuala Langat	Malay	Married	Primary or less	Working	B 40	Never smoked	Never drinked	Inactive	No	Yes	Yes	No	No	0	No	20	No dependency	8	No dependency	Yes	2	Minor injury	Outpatient	Inside the house	21	15	6.9	Possible sarcopenia
230	60-74	Male	Kuala Langat	Chinese	Married	Primary or less	Not employed	B 40	Never smoked	Alcohol drinker	Inactive	No	No	No	No	No	0	No	20	No dependency	8	No dependency	No	0	No injuries	Not treated	Not applicable	21	12	7.5	Possible sarcopenia
231	60-74	Male	Kuala Langat	Malay	Married	Secondary	Retired	B 40	Active smoker	Never drinked	Inactive	No	No	Yes	No	No	0	No	20	No dependency	8	No dependency	No	0	No injuries	Not treated	Not applicable	21	9	7.9	Possible sarcopenia
232	60-74	Female	Petaling	Indian	Married	Secondary	Housewife	B 40	Never smoked	Never drinked	Active	No	Yes	Yes	No	No	0	No	20	No dependency	7	Dependency	No	0	No injuries	Not treated	Not applicable	21.33	14	6.1	Possible sarcopenia
233	>75	Female	Kuala Langat	Chinese	Married	Primary or less	Housewife	B 40	Never smoked	Alcohol drinker	Inactive	No	Yes	No	No	No	0	No	20	No dependency	8	No dependency	No	0	No injuries	Not treated	Not applicable	21.33	14	7.2	Possible sarcopenia
234	60-74	Female	Kuala Langat	Malay	Married	Secondary	Housewife	B 40	Never smoked	Never drinked	Inactive	No	No	Yes	No	Yes	0	No	20	No dependency	8	No dependency	Yes	1	Minor injury	Outpatient	Inside the house	21.67	16	7.4	Possible sarcopenia
235	>75	Male	Petaling	Chinese	Married	Secondary	Not employed	B 40	Never smoked	Never drinked	Inactive	No	No	Yes	No	No	0	No	20	No dependency	8	No dependency	No	0	No injuries	Not treated	Not applicable	21.67	15	7.1	Possible sarcopenia
236	60-74	Female	Petaling	Malay	Married	Primary or less	Housewife	B 40	Never smoked	Never drinked	Active	No	Yes	No	No	No	0	No	20	No dependency	8	No dependency	Yes	1	Minor injury	Self treated	Inside the house	22	17	6.3	Possible sarcopenia
237	>75	Female	Petaling	Malay	Married	Primary or less	Housewife	B 40	Never smoked	Never drinked	Inactive	Yes	Yes	No	No	No	2	Yes	19	Dependency	6	Dependency	Yes	3	Minor injury	Outpatient	Outside the house	22.33	26	6.1	Possible sarcopenia
238	>75	Female	Kuala Langat	Indian	Widowed or divorced	Primary or less	Housewife	B 40	Never smoked	Never drinked	Inactive	Yes	Yes	No	No	No	0	No	20	No dependency	8	No dependency	Yes	3	Minor injury	Outpatient	Outside the house	22.33	19	6.4	Possible sarcopenia
239	>75	Male	Kuala Langat	Malay	Married	Secondary	Retired	B 40	Ex-smoker	Never drinked	Inactive	Yes	Yes	Yes	No	No	0	No	20	No dependency	8	No dependency	No	0	No injuries	Not treated	Not applicable	22.67	17	7.6	Possible sarcopenia
240	>75	Female	Kuala Langat	Indian	Married	Primary or less	Housewife	B 40	Never smoked	Never drinked	Inactive	Yes	Yes	Yes	No	No	0	No	20	No dependency	8	No dependency	No	0	No injuries	Not treated	Not applicable	22.67	16	5.8	Possible sarcopenia
241	60-74	Female	Petaling	Malay	Married	Secondary	Housewife	B 40	Never smoked	Never drinked	Inactive	No	No	No	No	No	0	No	20	No dependency	8	No dependency	No	0	No injuries	Not treated	Not applicable	22.67	15	6.9	Possible sarcopenia
242	60-74	Female	Petaling	Indian	Married	Primary or less	Housewife	B 40	Never smoked	Never drinked	Inactive	Yes	Yes	No	No	No	0	No	20	No dependency	5	Dependency	No	0	No injuries	Not treated	Not applicable	22.67	14	6.9	Possible sarcopenia
243	60-74	Female	Petaling	Chinese	Married	Primary or less	Housewife	B 40	Never smoked	Alcohol drinker	Inactive	Yes	No	No	No	No	0	No	20	No dependency	8	No dependency	No	0	No injuries	Not treated	Not applicable	22.67	14	5.7	Possible sarcopenia
244	>75	Male	Petaling	Malay	Widowed or divorced	Tertiary	Working	B 40	Active smoker	Never drinked	Active	No	No	Yes	No	No	0	No	18	Dependency	8	No dependency	Yes	1	Minor injury	Self treated	Inside the house	22.67	14	7.1	Possible sarcopenia
245	>75	Male	Kuala Langat	Malay	Married	Secondary	Retired	B 40	Never smoked	Never drinked	Inactive	Yes	Yes	Yes	No	No	0	No	20	No dependency	8	No dependency	No	0	No injuries	Not treated	Not applicable	22.67	14	8.9	Possible sarcopenia
246	>75	Male	Kuala Langat	Indian	Married	Secondary	Working	B 40	Never smoked	Never drinked	Inactive	No	Yes	Yes	Yes	No	0	No	20	No dependency	8	No dependency	No	0	No injuries	Not treated	Not applicable	22.67	11	7.2	Possible sarcopenia
247	60-74	Female	Petaling	Malay	Married	Secondary	Housewife	B 40	Never smoked	Never drinked	Inactive	No	No	No	No	No	0	No	20	No dependency	8	No dependency	No	0	No injuries	Not treated	Not applicable	23	15	6.1	Possible sarcopenia
248	60-74	Female	Petaling	Malay	Married	Secondary	Housewife	B 40	Never smoked	Never drinked	Inactive	No	No	Yes	No	No	0	No	20	No dependency	8	No dependency	No	0	No injuries	Not treated	Not applicable	23	15	6.8	Possible sarcopenia
249	60-74	Female	Kuala Langat	Malay	Married	Secondary	Housewife	B 40	Never smoked	Never drinked	Active	No	Yes	Yes	No	No	0	No	20	No dependency	8	No dependency	Yes	1	Minor injury	Outpatient	House yard	23	13	6	Possible sarcopenia
250	60-74	Male	Kuala Langat	Chinese	Married	Secondary	Working	B 40	Never smoked	Alcohol drinker	Inactive	No	Yes	Yes	No	No	0	No	20	No dependency	8	No dependency	No	0	No injuries	Not treated	Not applicable	23	11	7	Possible sarcopenia
251	60-74	Male	Petaling	Chinese	Married	Primary or less	Working	B 40	Never smoked	Alcohol drinker	Inactive	No	Yes	No	No	No	0	No	20	No dependency	8	No dependency	No	0	No injuries	Not treated	Not applicable	23	10	7.3	Possible sarcopenia
252	>75	Male	Petaling	Chinese	Married	Primary or less	Retired	B 40	Never smoked	Alcohol drinker	Inactive	No	Yes	Yes	Yes	No	0	No	20	No dependency	8	No dependency	Yes	2	Minor injury	Self treated	Inside the house	23.33	23	8.2	Possible sarcopenia
253	60-74	Male	Kuala Langat	Malay	Married	Secondary	Retired	B 40	Active smoker	Never drinked	Inactive	No	Yes	No	No	No	0	No	20	No dependency	8	No dependency	Yes	1	Minor injury	Outpatient	Inside the house	23.33	16	9	Possible sarcopenia
254	60-74	Male	Petaling	Chinese	Single	Secondary	Not employed	B 40	Never smoked	Never drinked	Inactive	No	No	Yes	No	No	0	No	20	No dependency	8	No dependency	Yes	1	Minor injury	Self treated	House yard	23.33	14	7.1	Possible sarcopenia
255	60-74	Female	Petaling	Indian	Married	Secondary	Housewife	B 40	Never smoked	Never drinked	Active	No	Yes	Yes	No	No	0	No	20	No dependency	7	Dependency	No	0	No injuries	Not treated	Not applicable	23.33	14	6.3	Possible sarcopenia
256	60-74	Male	Petaling	Malay	Married	Primary or less	Retired	B 40	Active smoker	Never drinked	Inactive	Yes	Yes	Yes	Yes	No	0	No	20	No dependency	8	No dependency	No	0	No injuries	Not treated	Not applicable	23.67	18	7.2	Possible sarcopenia
257	60-74	Female	Petaling	Malay	Married	Primary or less	Housewife	B 40	Never smoked	Never drinked	Inactive	Yes	Yes	No	No	No	0	No	20	No dependency	8	No dependency	No	0	No injuries	Not treated	Not applicable	23.67	16	7.8	Possible sarcopenia
258	60-74	Male	Petaling	Malay	Married	Tertiary	Working	B 40	Active smoker	Never drinked	Active	No	Yes	Yes	No	No	0	No	20	No dependency	8	No dependency	Yes	1	Minor injury	Self treated	House yard	23.67	9	7.8	Possible sarcopenia
259	60-74	Male	Petaling	Indian	Married	Tertiary	Working	B 40	Never smoked	Alcohol drinker	Active	Yes	Yes	Yes	No	Yes	0	No	20	No dependency	8	No dependency	No	0	No injuries	Not treated	Not applicable	24	13	7.2	Possible sarcopenia
260	>75	Female	Petaling	Indian	Married	Secondary	Housewife	B 40	Never smoked	Never drinked	Inactive	No	Yes	Yes	No	No	0	No	20	No dependency	5	Dependency	No	0	No injuries	Not treated	Not applicable	24.33	15	6.9	Possible sarcopenia
261	60-74	Male	Petaling	Malay	Married	Tertiary	Retired	B 40	Ex-smoker	Never drinked	Inactive	Yes	Yes	Yes	No	No	0	No	20	No dependency	8	No dependency	Yes	1	Minor injury	Outpatient	House yard	24.67	16	7.2	Possible sarcopenia
262	>75	Male	Kuala Langat	Malay	Married	Tertiary	Retired	B 40	Never smoked	Never drinked	Active	Yes	Yes	Yes	No	No	0	No	18	Dependency	8	No dependency	No	0	No injuries	Not treated	Not applicable	24.67	14	8.1	Possible sarcopenia
263	>75	Male	Petaling	Malay	Single	Tertiary	Retired	B 40	Active smoker	Never drinked	Active	No	Yes	Yes	No	No	0	No	19	Dependency	8	No dependency	Yes	4	Minor injury	Self treated	Inside the house	24.67	13	8.4	Possible sarcopenia
264	60-74	Male	Kuala Langat	Indian	Married	Primary or less	Not employed	B 40	Never smoked	Ex-drinker	Inactive	No	No	No	No	No	0	No	20	No dependency	7	Dependency	Yes	1	Severe injury	Admitted to hospital	House yard	25.33	21	7.6	Possible sarcopenia
265	60-74	Male	Petaling	Malay	Married	Primary or less	Working	B 40	Never smoked	Never drinked	Inactive	No	Yes	No	No	No	0	No	20	No dependency	8	No dependency	No	0	No injuries	Not treated	Not applicable	25.67	19	8.6	Possible sarcopenia
266	60-74	Male	Kuala Langat	Indian	Married	Secondary	Not employed	B 40	Ex-smoker	Ex-drinker	Inactive	Yes	Yes	Yes	Yes	No	2	Yes	20	No dependency	8	No dependency	No	0	No injuries	Not treated	Not applicable	25.67	18	8.1	Possible sarcopenia
267	60-74	Male	Petaling	Malay	Married	Primary or less	Not employed	B 40	Never smoked	Never drinked	Inactive	Yes	Yes	Yes	Yes	No	0	No	20	No dependency	8	No dependency	Yes	1	Minor injury	Self treated	House yard	26	17	7.1	Possible sarcopenia
268	60-74	Male	Petaling	Malay	Married	Secondary	Not employed	B 40	Never smoked	Never drinked	Active	Yes	Yes	Yes	No	No	2	Yes	20	No dependency	8	No dependency	No	0	No injuries	Not treated	Not applicable	26	15	8.2	Possible sarcopenia
269	60-74	Male	Petaling	Malay	Married	Secondary	Working	B 40	Active smoker	Never drinked	Inactive	No	Yes	No	No	No	0	No	20	No dependency	8	No dependency	No	0	No injuries	Not treated	Not applicable	26	14	7.8	Possible sarcopenia
270	60-74	Male	Kuala Langat	Chinese	Married	Primary or less	Not employed	B 40	Never smoked	Alcohol drinker	Inactive	No	Yes	Yes	No	No	0	No	20	No dependency	8	No dependency	No	0	No injuries	Not treated	Not applicable	26.33	13	8.3	Possible sarcopenia
271	60-74	Male	Petaling	Indian	Widowed or divorced	Tertiary	Retired	B 40	Active smoker	Alcohol drinker	Active	No	Yes	No	No	No	0	No	20	No dependency	8	No dependency	Yes	1	Minor injury	Outpatient	House yard	26.33	13	7.1	Possible sarcopenia
272	60-74	Male	Kuala Langat	Indian	Married	Primary or less	Working	B 40	Never smoked	Never drinked	Inactive	Yes	Yes	Yes	No	No	0	No	20	No dependency	8	No dependency	No	0	No injuries	Not treated	Not applicable	26.67	18	7.1	Possible sarcopenia
273	>75	Male	Petaling	Malay	Married	Primary or less	Not employed	B 40	Ex-smoker	Never drinked	Inactive	No	Yes	Yes	Yes	No	0	No	19	Dependency	6	Dependency	No	0	No injuries	Not treated	Not applicable	27	13	7	Possible sarcopenia
274	60-74	Male	Petaling	Malay	Married	Secondary	Working	T 20	Ex-smoker	Never drinked	Inactive	No	Yes	Yes	No	No	0	No	20	No dependency	8	No dependency	No	0	No injuries	Not treated	Not applicable	27.33	16	8.4	Possible sarcopenia
275	60-74	Male	Kuala Langat	Chinese	Married	Primary or less	Not employed	B 40	Never smoked	Alcohol drinker	Inactive	Yes	Yes	Yes	Yes	No	0	No	20	No dependency	8	No dependency	No	0	No injuries	Not treated	Not applicable	27.33	15	7.2	Possible sarcopenia
276	>75	Male	Petaling	Indian	Single	Secondary	Not employed	B 40	Ex-smoker	Alcohol drinker	Active	No	Yes	Yes	No	No	0	No	19	Dependency	5	Dependency	No	0	No injuries	Not treated	Not applicable	27.33	15	7.8	Possible sarcopenia
277	60-74	Male	Petaling	Malay	Married	Secondary	Retired	B 40	Never smoked	Never drinked	Inactive	No	Yes	No	No	No	0	No	20	No dependency	8	No dependency	Yes	1	Severe injury	Admitted to hospital	House yard	28.33	15	7.3	Possible sarcopenia
278	60-74	Male	Petaling	Malay	Married	Primary or less	Working	B 40	Never smoked	Never drinked	Inactive	No	Yes	No	No	No	0	No	19	Dependency	8	No dependency	Yes	1	Minor injury	Self treated	Inside the house	28.33	13	7.1	Possible sarcopenia
279	60-74	Male	Petaling	Indian	Married	Tertiary	Retired	B 40	Never smoked	Alcohol drinker	Active	No	Yes	No	No	No	0	No	20	No dependency	8	No dependency	No	0	No injuries	Not treated	Not applicable	28.67	14	7.7	Possible sarcopenia
280	60-74	Male	Kuala Langat	Indian	Married	Primary or less	Not employed	B 40	Never smoked	Alcohol drinker	Inactive	Yes	Yes	Yes	No	No	0	No	20	No dependency	8	No dependency	Yes	1	Minor injury	Self treated	Inside the house	29	18	8	Possible sarcopenia
281	>75	Male	Petaling	Indian	Married	Secondary	Not employed	B 40	Never smoked	Never drinked	Inactive	Yes	Yes	No	No	No	2	Yes	20	No dependency	8	No dependency	No	0	No injuries	Not treated	Not applicable	29	14	7.6	Possible sarcopenia
282	>75	Male	Petaling	Malay	Married	Secondary	Not employed	B 40	Active smoker	Never drinked	Inactive	No	Yes	No	No	No	0	No	18	Dependency	5	Dependency	No	0	No injuries	Not treated	Not applicable	29.33	15	9.5	Possible sarcopenia
283	60-74	Male	Petaling	Chinese	Married	Primary or less	Working	B 40	Never smoked	Alcohol drinker	Inactive	No	Yes	No	No	No	0	No	19	Dependency	8	No dependency	No	0	No injuries	Not treated	Not applicable	30	17	7.5	Possible sarcopenia
284	>75	Male	Kuala Langat	Malay	Married	Secondary	Retired	B 40	Active smoker	Never drinked	Inactive	Yes	Yes	No	No	No	0	No	18	Dependency	3	Dependency	No	0	No injuries	Not treated	Not applicable	30.33	19	7.3	Possible sarcopenia
285	60-74	Male	Kuala Langat	Malay	Married	Secondary	Not employed	B 40	Never smoked	Never drinked	Inactive	Yes	Yes	Yes	No	No	0	No	20	No dependency	8	No dependency	No	0	No injuries	Not treated	Not applicable	30.33	17	8.2	Possible sarcopenia
286	60-74	Male	Kuala Langat	Malay	Married	Tertiary	Retired	B 40	Never smoked	Never drinked	Inactive	No	No	Yes	No	No	0	No	19	Dependency	8	No dependency	No	0	No injuries	Not treated	Not applicable	30.33	17	8.2	Possible sarcopenia
287	60-74	Male	Petaling	Indian	Married	Tertiary	Retired	B 40	Never smoked	Never drinked	Active	Yes	No	No	No	No	0	No	20	No dependency	8	No dependency	No	0	No injuries	Not treated	Not applicable	30.33	16	7	Possible sarcopenia
288	60-74	Male	Kuala Langat	Indian	Married	Secondary	Working	B 40	Never smoked	Never drinked	Inactive	No	Yes	No	Yes	No	0	No	20	No dependency	8	No dependency	No	0	No injuries	Not treated	Not applicable	30.67	20	8.4	Possible sarcopenia
289	60-74	Male	Petaling	Indian	Married	Primary or less	Working	B 40	Never smoked	Never drinked	Inactive	Yes	Yes	Yes	No	No	0	No	20	No dependency	8	No dependency	Yes	1	Severe injury	Admitted to hospital	Inside the house	30.67	17	7.9	Possible sarcopenia
290	60-74	Male	Petaling	Indian	Married	Secondary	Not employed	B 40	Never smoked	Alcohol drinker	Inactive	No	Yes	Yes	No	No	0	No	20	No dependency	8	No dependency	Yes	1	Minor injury	Self treated	Outside the house	30.67	15	7.7	Possible sarcopenia
291	60-74	Male	Petaling	Malay	Married	Secondary	Working	B 40	Active smoker	Never drinked	Inactive	No	Yes	Yes	No	No	0	No	20	No dependency	8	No dependency	No	0	No injuries	Not treated	Not applicable	31.67	16	7.8	Possible sarcopenia
292	60-74	Male	Kuala Langat	Indian	Married	Secondary	Working	B 40	Ex-smoker	Alcohol drinker	Inactive	No	No	No	No	No	0	No	20	No dependency	8	No dependency	No	0	No injuries	Not treated	Not applicable	32.67	16	7.4	Possible sarcopenia
293	60-74	Male	Petaling	Indian	Married	Secondary	Working	M 40	Active smoker	Alcohol drinker	Active	Yes	No	Yes	No	No	0	No	20	No dependency	8	No dependency	No	0	No injuries	Not treated	Not applicable	32.67	15	8.1	Possible sarcopenia
294	60-74	Male	Petaling	Indian	Married	Secondary	Not employed	B 40	Active smoker	Alcohol drinker	Inactive	Yes	No	Yes	No	No	0	No	20	No dependency	8	No dependency	Yes	1	Minor injury	Self treated	Inside the house	33	15	7.6	Possible sarcopenia
295	60-74	Male	Kuala Langat	Chinese	Married	Secondary	Not employed	B 40	Never smoked	Never drinked	Inactive	No	No	No	No	No	0	No	20	No dependency	8	No dependency	No	0	No injuries	Not treated	Not applicable	33	14	8.8	Possible sarcopenia
296	60-74	Male	Kuala Langat	Indian	Married	Tertiary	Working	B 40	Never smoked	Never drinked	Active	No	Yes	Yes	No	No	0	No	20	No dependency	8	No dependency	No	0	No injuries	Not treated	Not applicable	33.33	13	7.4	Possible sarcopenia
297	60-74	Male	Petaling	Indian	Widowed or divorced	Tertiary	Not employed	M 40	Never smoked	Never drinked	Inactive	Yes	Yes	Yes	No	No	0	No	18	Dependency	8	No dependency	Yes	1	Minor injury	Self treated	House yard	33.67	17	7.2	Possible sarcopenia
298	60-74	Male	Petaling	Malay	Married	Primary or less	Retired	B 40	Ex-smoker	Never drinked	Inactive	Yes	Yes	Yes	No	No	0	No	20	No dependency	8	No dependency	Yes	1	Minor injury	Self treated	Bathroom/toilet	35	22	7.8	Possible sarcopenia
299	60-74	Male	Petaling	Malay	Married	Secondary	Retired	B 40	Never smoked	Never drinked	Active	No	No	No	No	No	0	No	20	No dependency	8	No dependency	No	0	No injuries	Not treated	Not applicable	35.33	19	8	Possible sarcopenia
300	60-74	Male	Petaling	Malay	Married	Primary or less	Not employed	B 40	Never smoked	Never drinked	Inactive	No	Yes	Yes	No	Yes	0	No	20	No dependency	8	No dependency	No	0	No injuries	Not treated	Not applicable	35.33	16	7.6	Possible sarcopenia
301	60-74	Male	Petaling	Indian	Married	Primary or less	Working	B 40	Never smoked	Alcohol drinker	Inactive	Yes	Yes	No	No	No	0	No	20	No dependency	8	No dependency	No	0	No injuries	Not treated	Not applicable	35.33	13	7.8	Possible sarcopenia
302	60-74	Male	Kuala Langat	Malay	Married	Tertiary	Retired	B 40	Never smoked	Never drinked	Inactive	No	No	No	No	No	0	No	20	No dependency	8	No dependency	No	0	No injuries	Not treated	Not applicable	37	16	7.2	Possible sarcopenia
303	60-74	Male	Petaling	Malay	Married	Secondary	Retired	T 20	Never smoked	Never drinked	Inactive	No	No	No	No	No	0	No	20	No dependency	8	No dependency	No	0	No injuries	Not treated	Not applicable	38.67	15	7.7	Possible sarcopenia
304	60-74	Male	Kuala Langat	Malay	Married	Primary or less	Working	B 40	Active smoker	Never drinked	Inactive	No	Yes	Yes	No	No	0	No	20	No dependency	8	No dependency	No	0	No injuries	Not treated	Not applicable	39.67	14	7.3	Possible sarcopenia
305	>75	Male	Kuala Langat	Malay	Married	Secondary	Not employed	B 40	Never smoked	Never drinked	Active	No	Yes	Yes	No	No	0	No	20	No dependency	8	No dependency	No	0	No injuries	Not treated	Not applicable	42.33	14	7.3	Possible sarcopenia
306	60-74	Male	Petaling	Malay	Married	Secondary	Not employed	B 40	Never smoked	Never drinked	Inactive	No	No	Yes	No	No	0	No	20	No dependency	8	No dependency	No	0	No injuries	Not treated	Not applicable	43	18	7.2	Possible sarcopenia
307	60-74	Male	Petaling	Malay	Married	Secondary	Working	B 40	Active smoker	Never drinked	Inactive	Yes	Yes	Yes	No	No	0	No	20	No dependency	8	No dependency	No	0	No injuries	Not treated	Not applicable	43.33	14	9.2	Possible sarcopenia
308	60-74	Female	Kuala Langat	Chinese	Married	Primary or less	Housewife	B 40	Never smoked	Alcohol drinker	Inactive	No	No	Yes	No	No	0	No	19	Dependency	8	No dependency	Yes	1	Minor injury	Outpatient	Inside the house	11.33	9	5.2	Sarcopenia
309	>75	Female	Petaling	Indian	Widowed or divorced	Primary or less	Housewife	B 40	Never smoked	Never drinked	Active	No	No	No	No	No	0	No	19	Dependency	8	No dependency	Yes	1	Minor injury	Self treated	Inside the house	12.33	11	5.3	Sarcopenia
310	60-74	Female	Kuala Langat	Chinese	Married	Primary or less	Housewife	B 40	Never smoked	Never drinked	Inactive	Yes	Yes	Yes	No	No	0	No	18	Dependency	8	No dependency	Yes	1	Minor injury	Self treated	Inside the house	12.67	11	5	Sarcopenia
311	60-74	Female	Kuala Langat	Chinese	Married	Primary or less	Housewife	B 40	Never smoked	Never drinked	Inactive	No	No	Yes	No	No	0	No	20	No dependency	8	No dependency	No	0	No injuries	Not treated	Not applicable	14.67	10	5.2	Sarcopenia
312	60-74	Female	Kuala Langat	Chinese	Married	Primary or less	Housewife	B 40	Never smoked	Never drinked	Active	No	No	No	No	No	0	No	20	No dependency	6	Dependency	No	0	No injuries	Not treated	Not applicable	15	7	5.5	Sarcopenia
313	>75	Female	Kuala Langat	Malay	Married	Secondary	Retired	B 40	Never smoked	Never drinked	Inactive	Yes	Yes	Yes	No	No	0	No	19	Dependency	8	No dependency	No	0	No injuries	Not treated	Not applicable	15.33	9	5.4	Sarcopenia
314	>75	Female	Kuala Langat	Chinese	Married	Primary or less	Housewife	B 40	Never smoked	Never drinked	Inactive	No	No	Yes	No	No	0	No	17	Dependency	8	No dependency	Yes	1	Minor injury	Self treated	Bathroom/toilet	16	11	4.4	Sarcopenia
315	>75	Female	Kuala Langat	Malay	Married	Primary or less	Housewife	B 40	Never smoked	Never drinked	Inactive	No	No	Yes	No	No	2	Yes	19	Dependency	7	Dependency	Yes	1	Minor injury	Self treated	Inside the house	16	10	5.6	Sarcopenia
316	60-74	Female	Kuala Langat	Chinese	Single	Primary or less	Housewife	B 40	Never smoked	Never drinked	Active	No	No	No	No	No	0	No	19	Dependency	8	No dependency	No	0	No injuries	Not treated	Not applicable	16	8	5	Sarcopenia
317	60-74	Female	Kuala Langat	Indian	Married	Primary or less	Housewife	B 40	Never smoked	Never drinked	Active	No	No	Yes	No	No	0	No	19	Dependency	8	No dependency	No	0	No injuries	Not treated	Not applicable	16.33	10	5.1	Sarcopenia
318	60-74	Female	Kuala Langat	Indian	Married	Secondary	Working	T 20	Never smoked	Never drinked	Active	No	No	No	No	No	0	No	20	No dependency	7	Dependency	Yes	1	Minor injury	Outpatient	Inside the house	16.33	9	4.5	Sarcopenia
319	60-74	Female	Kuala Langat	Chinese	Married	Primary or less	Housewife	B 40	Never smoked	Never drinked	Active	No	Yes	Yes	No	No	2	Yes	19	Dependency	6	Dependency	No	0	No injuries	Not treated	Not applicable	16.33	7	5.5	Sarcopenia
320	>75	Female	Kuala Langat	Chinese	Married	Primary or less	Housewife	B 40	Never smoked	Never drinked	Inactive	No	No	Yes	No	No	0	No	19	Dependency	5	Dependency	Yes	1	Severe injury	Outpatient	Inside the house	16.67	12	5.4	Sarcopenia
321	60-74	Female	Kuala Langat	Chinese	Married	Secondary	Housewife	B 40	Never smoked	Never drinked	Inactive	No	No	No	No	No	0	No	20	No dependency	6	Dependency	No	0	No injuries	Not treated	Not applicable	16.67	10	5.6	Sarcopenia
322	60-74	Female	Kuala Langat	Malay	Married	Secondary	Housewife	B 40	Never smoked	Never drinked	Inactive	No	No	Yes	No	No	0	No	20	No dependency	8	No dependency	Yes	1	Minor injury	Self treated	House yard	16.67	9	5.5	Sarcopenia
323	60-74	Female	Kuala Langat	Chinese	Married	Secondary	Not employed	B 40	Never smoked	Never drinked	Active	Yes	No	No	No	No	2	Yes	20	No dependency	6	Dependency	Yes	5	Minor injury	Self treated	Inside the house	16.67	8	5.5	Sarcopenia
324	60-74	Female	Petaling	Malay	Married	Primary or less	Working	B 40	Never smoked	Never drinked	Active	No	No	Yes	No	No	0	No	20	Dependency	8	No dependency	No	0	No injuries	Not treated	Not applicable	17.33	11	5.6	Sarcopenia
325	>75	Female	Petaling	Indian	Widowed or divorced	Secondary	Housewife	B 40	Never smoked	Never drinked	Inactive	No	Yes	No	No	No	2	Yes	19	Dependency	5	Dependency	No	0	No injuries	Not treated	Not applicable	17.67	11	5.5	Sarcopenia
326	60-74	Female	Petaling	Malay	Married	Secondary	Housewife	B 40	Never smoked	Never drinked	Inactive	Yes	Yes	Yes	No	No	0	No	20	Dependency	8	No dependency	Yes	1	Minor injury	Outpatient	Inside the house	18.67	12	5.4	Sarcopenia
327	>75	Female	Petaling	Indian	Married	Tertiary	Housewife	T 20	Never smoked	Never drinked	Active	No	No	No	No	Yes	1	No	20	Dependency	8	No dependency	No	0	No injuries	Not treated	Not applicable	19	13	5.5	Sarcopenia
328	60-74	Female	Petaling	Indian	Married	Primary or less	Housewife	B 40	Never smoked	Never drinked	Inactive	No	No	No	No	No	0	No	19	Dependency	8	No dependency	No	0	No injuries	Not treated	Not applicable	19.33	12	5.4	Sarcopenia
329	60-74	Female	Petaling	Chinese	Married	Secondary	Working	B 40	Never smoked	Never drinked	Active	No	No	No	No	No	0	No	20	No dependency	8	No dependency	Yes	1	Minor injury	Self treated	Bathroom/toilet	19.67	13	5.6	Sarcopenia
330	60-74	Female	Petaling	Malay	Married	Secondary	Retired	B 40	Never smoked	Never drinked	Inactive	No	No	No	No	Yes	0	No	20	Dependency	8	No dependency	No	0	No injuries	Not treated	Not applicable	20	12	5.5	Sarcopenia
331	60-74	Female	Petaling	Indian	Widowed or divorced	Secondary	Housewife	B 40	Never smoked	Never drinked	Active	No	Yes	Yes	No	No	0	No	20	Dependency	8	No dependency	Yes	5	Minor injury	Self treated	Inside the house	20	12	5.2	Sarcopenia
332	>75	Male	Petaling	Chinese	Married	Secondary	Not employed	B 40	Never smoked	Alcohol drinker	Inactive	No	No	Yes	No	No	0	No	19	Dependency	6	Dependency	Yes	1	Minor injury	Self treated	Inside the house	20	9	6.3	Sarcopenia
333	60-74	Female	Petaling	Indian	Married	Primary or less	Housewife	B 40	Never smoked	Never drinked	Inactive	Yes	Yes	Yes	No	Yes	0	No	20	Dependency	6	Dependency	Yes	2	Minor injury	Self treated	Inside the house	20.33	12	5.5	Sarcopenia
334	60-74	Female	Kuala Langat	Chinese	Married	Secondary	Housewife	B 40	Never smoked	Never drinked	Inactive	No	Yes	No	No	No	0	No	20	Dependency	8	No dependency	No	0	No injuries	Not treated	Not applicable	20.33	12	5	Sarcopenia
335	60-74	Female	Petaling	Indian	Married	Secondary	Housewife	B 40	Never smoked	Never drinked	Inactive	No	Yes	Yes	No	No	0	No	19	Dependency	5	Dependency	Yes	1	Severe injury	Admitted to hospital	Inside the house	20.33	12	5.3	Sarcopenia
336	60-74	Male	Kuala Langat	Chinese	Married	Primary or less	Not employed	B 40	Never smoked	Never drinked	Inactive	No	Yes	Yes	No	No	0	No	20	No dependency	8	No dependency	Yes	1	Minor injury	Self treated	Inside the house	20.33	9	6.5	Sarcopenia
337	>75	Male	Petaling	Chinese	Married	Primary or less	Not employed	B 40	Ex-smoker	Alcohol drinker	Inactive	No	Yes	Yes	No	No	0	No	16	Dependency	8	No dependency	Yes	1	Minor injury	Outpatient	Bathroom/toilet	21	11	6.9	Sarcopenia
338	60-74	Female	Petaling	Chinese	Married	Secondary	Working	B 40	Never smoked	Never drinked	Inactive	No	No	Yes	No	No	0	No	20	No dependency	8	No dependency	No	0	No injuries	Not treated	Not applicable	21.33	13	5.3	Sarcopenia
339	60-74	Female	Kuala Langat	Malay	Married	Secondary	Housewife	B 40	Never smoked	Never drinked	Inactive	Yes	Yes	Yes	No	No	0	No	20	Dependency	5	Dependency	No	0	No injuries	Not treated	Not applicable	21.33	12	5.5	Sarcopenia
340	>75	Male	Kuala Langat	Chinese	Married	Primary or less	Not employed	B 40	Never smoked	Ex-drinker	Inactive	No	Yes	Yes	Yes	No	0	No	19	Dependency	8	No dependency	No	0	No injuries	Not treated	Not applicable	21.33	11	6.7	Sarcopenia
341	60-74	Female	Kuala Langat	Chinese	Married	Primary or less	Housewife	B 40	Never smoked	Never drinked	Inactive	No	No	Yes	No	No	0	No	20	No dependency	8	No dependency	No	0	No injuries	Not treated	Not applicable	21.67	12	5.6	Sarcopenia
342	60-74	Male	Kuala Langat	Indian	Married	Secondary	Working	B 40	Never smoked	Alcohol drinker	Inactive	Yes	Yes	Yes	No	No	0	No	20	No dependency	8	No dependency	Yes	1	Minor injury	Self treated	Bathroom/toilet	22.67	10	6.9	Sarcopenia
343	60-74	Female	Petaling	Malay	Widowed or divorced	Secondary	Housewife	B 40	Never smoked	Never drinked	Active	No	No	No	No	No	0	No	19	Dependency	8	No dependency	Yes	1	Minor injury	Self treated	Outside the house	23.67	12	4.9	Sarcopenia
344	60-74	Male	Kuala Langat	Chinese	Married	Secondary	Not employed	B 40	Never smoked	Never drinked	Active	No	No	Yes	Yes	No	0	No	20	No dependency	8	No dependency	No	0	No injuries	Not treated	Not applicable	24.33	12	6.4	Sarcopenia
345	>75	Male	Kuala Langat	Malay	Married	Secondary	Not employed	B 40	Ex-smoker	Never drinked	Inactive	No	Yes	Yes	No	No	0	No	18	Dependency	8	No dependency	No	0	No injuries	Not treated	Not applicable	24.33	12	6.6	Sarcopenia
346	60-74	Male	Kuala Langat	Malay	Married	Secondary	Not employed	B 40	Active smoker	Never drinked	Active	No	No	Yes	Yes	No	0	No	20	No dependency	8	No dependency	No	0	No injuries	Not treated	Not applicable	25.33	11	6.8	Sarcopenia
347	60-74	Male	Kuala Langat	Malay	Married	Tertiary	Retired	M 40	Never smoked	Never drinked	Inactive	Yes	Yes	Yes	Yes	No	2	Yes	20	No dependency	7	Dependency	Yes	1	Minor injury	Self treated	Inside the house	25.33	10	6.9	Sarcopenia
348	60-74	Male	Kuala Langat	Malay	Single	Primary or less	Not employed	B 40	Active smoker	Never drinked	Inactive	No	Yes	No	No	No	2	Yes	19	Dependency	7	Dependency	Yes	1	Minor injury	Self treated	House yard	26	11	6.8	Sarcopenia
349	60-74	Male	Kuala Langat	Indian	Married	Primary or less	Not employed	B 40	Never smoked	Never drinked	Inactive	No	No	No	No	No	0	No	19	Dependency	8	No dependency	Yes	1	Minor injury	Self treated	House yard	26	11	6.9	Sarcopenia
350	60-74	Male	Petaling	Indian	Married	Primary or less	Working	B 40	Never smoked	Alcohol drinker	Inactive	No	No	Yes	No	No	0	No	20	No dependency	8	No dependency	Yes	1	Minor injury	Outpatient	Bathroom/toilet	26	7	6.9	Sarcopenia
351	60-74	Male	Kuala Langat	Chinese	Married	Primary or less	Not employed	B 40	Active smoker	Alcohol drinker	Inactive	No	Yes	Yes	No	No	2	Yes	20	No dependency	8	No dependency	No	0	No injuries	Not treated	Not applicable	26.33	11	6.4	Sarcopenia
352	60-74	Male	Kuala Langat	Malay	Married	Primary or less	Retired	B 40	Active smoker	Never drinked	Active	No	No	Yes	Yes	Yes	0	No	19	Dependency	8	No dependency	No	0	No injuries	Not treated	Not applicable	26.33	10	6.4	Sarcopenia
353	>75	Male	Kuala Langat	Malay	Married	Primary or less	Working	B 40	Active smoker	Never drinked	Inactive	No	No	No	No	No	2	Yes	18	Dependency	8	No dependency	Yes	1	Minor injury	Self treated	Inside the house	26.67	11	6.7	Sarcopenia
354	60-74	Male	Kuala Langat	Indian	Married	Primary or less	Retired	B 40	Never smoked	Alcohol drinker	Inactive	Yes	Yes	No	Yes	No	0	No	19	Dependency	8	No dependency	Yes	1	Minor injury	Outpatient	Bathroom/toilet	26.67	10	6	Sarcopenia
355	60-74	Female	Petaling	Indian	Single	Primary or less	Housewife	B 40	Never smoked	Never drinked	Active	Yes	Yes	No	No	No	0	No	20	No dependency	6	Dependency	Yes	1	Minor injury	Self treated	House yard	8.33	19	4.1	Severe sarcopenia
356	>75	Female	Petaling	Chinese	Married	Primary or less	Housewife	B 40	Never smoked	Never drinked	Inactive	No	Yes	No	No	No	0	No	17	Dependency	8	No dependency	Yes	1	Minor injury	Self treated	Inside the house	9	21	5.2	Severe sarcopenia
357	>75	Female	Petaling	Chinese	Married	Primary or less	Housewife	B 40	Never smoked	Never drinked	Inactive	Yes	Yes	Yes	No	Yes	0	No	19	Dependency	8	No dependency	No	0	No injuries	Not treated	Not applicable	10.67	28	5.4	Severe sarcopenia
358	>75	Female	Petaling	Malay	Married	Primary or less	Housewife	B 40	Never smoked	Never drinked	Inactive	No	Yes	Yes	No	No	0	No	20	No dependency	8	No dependency	No	0	No injuries	Not treated	Not applicable	10.67	13	5.6	Severe sarcopenia
359	60-74	Female	Petaling	Chinese	Widowed or divorced	Primary or less	Working	B 40	Never smoked	Never drinked	Inactive	No	Yes	No	No	No	0	No	20	No dependency	8	No dependency	Yes	1	Minor injury	Self treated	Outside the house	11	18	4.9	Severe sarcopenia
360	>75	Male	Kuala Langat	Chinese	Married	Primary or less	Not employed	B 40	Ex-smoker	Never drinked	Inactive	No	No	Yes	Yes	No	2	Yes	16	Dependency	2	Dependency	Yes	1	Minor injury	Outpatient	Outside the house	11.67	18	6.3	Severe sarcopenia
361	60-74	Female	Kuala Langat	Indian	Married	Primary or less	Housewife	B 40	Never smoked	Never drinked	Inactive	Yes	Yes	Yes	Yes	No	0	No	20	No dependency	7	Dependency	No	0	No injuries	Not treated	Not applicable	11.67	18	5.4	Severe sarcopenia
362	60-74	Female	Petaling	Indian	Married	Primary or less	Housewife	B 40	Never smoked	Never drinked	Inactive	Yes	Yes	Yes	No	No	1	No	19	Dependency	8	No dependency	No	0	No injuries	Not treated	Not applicable	11.67	16	5.4	Severe sarcopenia
363	>75	Female	Petaling	Chinese	Married	Primary or less	Housewife	B 40	Never smoked	Never drinked	Inactive	No	Yes	No	No	No	0	No	19	Dependency	7	Dependency	No	0	No injuries	Not treated	Not applicable	11.67	15	5.4	Severe sarcopenia
364	60-74	Female	Kuala Langat	Chinese	Married	Primary or less	Housewife	B 40	Never smoked	Never drinked	Inactive	No	No	Yes	No	No	0	No	20	No dependency	8	No dependency	Yes	1	Minor injury	Self treated	Outside the house	11.67	13	5.5	Severe sarcopenia
365	60-74	Female	Petaling	Malay	Married	Secondary	Housewife	B 40	Never smoked	Never drinked	Inactive	No	No	No	No	No	0	No	20	No dependency	8	No dependency	Yes	1	Minor injury	Self treated	Inside the house	11.67	12	5.4	Severe sarcopenia
366	60-74	Male	Petaling	Chinese	Married	Primary or less	Not employed	B 40	Never smoked	Never drinked	Inactive	Yes	Yes	Yes	Yes	No	0	No	19	Dependency	8	No dependency	Yes	1	Minor injury	Outpatient	Bathroom/toilet	12	18	6.5	Severe sarcopenia
367	>75	Female	Petaling	Chinese	Widowed or divorced	Primary or less	Housewife	B 40	Never smoked	Never drinked	Inactive	Yes	Yes	No	No	Yes	0	No	20	No dependency	2	Dependency	Yes	2	Minor injury	Outpatient	Bathroom/toilet	12	18	3.5	Severe sarcopenia
368	60-74	Female	Petaling	Indian	Widowed or divorced	Primary or less	Housewife	B 40	Never smoked	Never drinked	Inactive	No	No	Yes	No	No	0	No	20	No dependency	6	Dependency	Yes	1	Minor injury	Self treated	Inside the house	12	13	4.9	Severe sarcopenia
369	60-74	Female	Petaling	Indian	Widowed or divorced	Secondary	Housewife	B 40	Never smoked	Never drinked	Inactive	No	No	Yes	No	No	0	No	19	Dependency	5	Dependency	No	0	No injuries	Not treated	Not applicable	12	13	4.2	Severe sarcopenia
370	>75	Female	Petaling	Indian	Widowed or divorced	Primary or less	Housewife	B 40	Never smoked	Never drinked	Inactive	No	Yes	Yes	No	No	2	Yes	17	Dependency	3	Dependency	No	0	No injuries	Not treated	Not applicable	12.33	25	5.2	Severe sarcopenia
371	>75	Male	Petaling	Malay	Married	Primary or less	Not employed	B 40	Never smoked	Never drinked	Inactive	Yes	Yes	Yes	No	No	0	No	17	Dependency	3	Dependency	Yes	1	Minor injury	Self treated	Inside the house	12.33	19	6.5	Severe sarcopenia
372	60-74	Female	Petaling	Indian	Married	Secondary	Housewife	B 40	Never smoked	Never drinked	Inactive	No	No	Yes	No	Yes	0	No	19	Dependency	5	Dependency	Yes	1	Minor injury	Self treated	Inside the house	12.33	18	4.6	Severe sarcopenia
373	>75	Female	Kuala Langat	Chinese	Married	Primary or less	Housewife	B 40	Never smoked	Never drinked	Inactive	No	No	No	No	No	0	No	19	Dependency	5	Dependency	Yes	1	Minor injury	Outpatient	Inside the house	12.67	22	5.1	Severe sarcopenia
374	60-74	Female	Petaling	Indian	Widowed or divorced	Primary or less	Housewife	B 40	Never smoked	Never drinked	Active	No	No	Yes	No	Yes	0	No	20	No dependency	6	Dependency	Yes	3	Minor injury	Self treated	Inside the house	12.67	19	3.6	Severe sarcopenia
375	60-74	Female	Kuala Langat	Malay	Married	Secondary	Housewife	B 40	Never smoked	Never drinked	Inactive	No	Yes	No	No	No	0	No	18	Dependency	5	Dependency	Yes	1	Minor injury	Self treated	House yard	12.67	17	5.6	Severe sarcopenia
376	>75	Female	Kuala Langat	Indian	Married	Primary or less	Housewife	B 40	Never smoked	Never drinked	Inactive	No	Yes	No	Yes	Yes	0	No	18	Dependency	5	Dependency	Yes	1	Minor injury	Outpatient	Inside the house	12.67	16	5.5	Severe sarcopenia
377	>75	Female	Kuala Langat	Chinese	Married	Primary or less	Housewife	B 40	Never smoked	Never drinked	Inactive	No	No	No	No	Yes	2	Yes	17	Dependency	5	Dependency	Yes	1	Minor injury	Outpatient	Bathroom/toilet	12.67	13	3.9	Severe sarcopenia
378	>75	Female	Petaling	Malay	Married	Primary or less	Housewife	B 40	Never smoked	Never drinked	Active	Yes	Yes	Yes	No	No	0	No	20	No dependency	8	No dependency	Yes	1	Minor injury	Self treated	Inside the house	12.67	13	4.9	Severe sarcopenia
379	60-74	Female	Kuala Langat	Indian	Widowed or divorced	Secondary	Housewife	B 40	Never smoked	Never drinked	Inactive	Yes	Yes	Yes	No	Yes	0	No	17	Dependency	3	Dependency	Yes	5	Severe injury	Admitted to hospital	Inside the house	13	22	4.9	Severe sarcopenia
380	60-74	Female	Petaling	Malay	Married	Primary or less	Housewife	B 40	Never smoked	Never drinked	Inactive	No	Yes	No	No	No	0	No	20	No dependency	7	Dependency	Yes	1	Minor injury	Self treated	Inside the house	13.33	21	4.8	Severe sarcopenia
381	60-74	Female	Kuala Langat	Chinese	Married	Primary or less	Housewife	B 40	Never smoked	Never drinked	Inactive	No	No	Yes	No	No	0	No	18	Dependency	6	Dependency	Yes	1	Minor injury	Self treated	Inside the house	13.33	16	3.4	Severe sarcopenia
382	>75	Female	Petaling	Malay	Married	Primary or less	Housewife	B 40	Never smoked	Never drinked	Inactive	No	Yes	Yes	No	No	2	Yes	20	No dependency	5	Dependency	Yes	2	Minor injury	Self treated	Outside the house	13.67	19	3.6	Severe sarcopenia
383	60-74	Female	Petaling	Chinese	Married	Primary or less	Housewife	B 40	Never smoked	Never drinked	Active	No	No	Yes	No	No	0	No	20	No dependency	8	No dependency	Yes	1	Minor injury	Self treated	Inside the house	13.67	18	4.6	Severe sarcopenia
384	60-74	Female	Petaling	Indian	Married	Secondary	Housewife	B 40	Never smoked	Never drinked	Inactive	No	No	No	No	No	0	No	20	No dependency	8	No dependency	Yes	2	Minor injury	Self treated	Inside the house	13.67	17	5.6	Severe sarcopenia
385	>75	Female	Petaling	Chinese	Married	Secondary	Housewife	B 40	Never smoked	Never drinked	Inactive	No	Yes	Yes	No	Yes	0	No	19	Dependency	5	Dependency	Yes	1	Severe injury	Admitted to hospital	Bathroom/toilet	13.67	14	5.4	Severe sarcopenia
386	60-74	Female	Petaling	Chinese	Married	Secondary	Housewife	B 40	Never smoked	Never drinked	Active	No	No	No	No	No	0	No	20	No dependency	8	No dependency	No	0	No injuries	Not treated	Not applicable	13.67	14	5.6	Severe sarcopenia
387	60-74	Female	Petaling	Malay	Married	Secondary	Housewife	B 40	Never smoked	Never drinked	Inactive	No	Yes	Yes	No	No	0	No	20	No dependency	8	No dependency	Yes	2	Minor injury	Self treated	Inside the house	13.67	13	4.9	Severe sarcopenia
388	>75	Male	Kuala Langat	Chinese	Married	Primary or less	Not employed	B 40	Ex-smoker	Never drinked	Inactive	Yes	Yes	No	No	No	0	No	16	Dependency	2	Dependency	Yes	1	Minor injury	Outpatient	Bathroom/toilet	14	20	6.8	Severe sarcopenia
389	60-74	Female	Petaling	Indian	Single	Secondary	Housewife	B 40	Never smoked	Alcohol drinker	Inactive	No	No	No	No	No	0	No	20	No dependency	4	Dependency	Yes	1	Minor injury	Self treated	Inside the house	14.33	17	5.5	Severe sarcopenia
390	>75	Female	Kuala Langat	Malay	Widowed or divorced	Primary or less	Housewife	B 40	Never smoked	Never drinked	Inactive	No	No	Yes	Yes	No	2	Yes	17	Dependency	3	Dependency	Yes	1	Minor injury	Outpatient	Bathroom/toilet	14.33	17	5.1	Severe sarcopenia
391	>75	Female	Kuala Langat	Malay	Married	Secondary	Housewife	B 40	Never smoked	Never drinked	Inactive	No	No	Yes	No	No	2	Yes	18	Dependency	6	Dependency	Yes	1	Minor injury	Outpatient	Inside the house	14.33	12	4.7	Severe sarcopenia
392	>75	Female	Petaling	Indian	Married	Primary or less	Housewife	B 40	Never smoked	Never drinked	Inactive	Yes	Yes	Yes	No	No	2	Yes	20	No dependency	6	Dependency	Yes	1	Minor injury	Self treated	Inside the house	14.67	20	4.5	Severe sarcopenia
393	60-74	Female	Petaling	Indian	Married	Secondary	Housewife	B 40	Never smoked	Never drinked	Inactive	No	Yes	Yes	No	No	0	No	20	No dependency	7	Dependency	Yes	1	Minor injury	Self treated	House yard	14.67	17	5.1	Severe sarcopenia
394	60-74	Female	Petaling	Indian	Married	Primary or less	Housewife	B 40	Never smoked	Never drinked	Inactive	No	No	Yes	No	No	0	No	19	Dependency	6	Dependency	Yes	3	Minor injury	Self treated	Inside the house	15	25	4.9	Severe sarcopenia
395	60-74	Male	Petaling	Indian	Married	Primary or less	Not employed	B 40	Active smoker	Alcohol drinker	Inactive	No	Yes	Yes	No	No	2	Yes	20	No dependency	8	No dependency	Yes	1	Minor injury	Outpatient	Inside the house	15	19	5.9	Severe sarcopenia
396	>75	Male	Petaling	Malay	Married	Primary or less	Not employed	B 40	Ex-smoker	Never drinked	Inactive	Yes	Yes	Yes	No	No	0	No	17	Dependency	3	Dependency	Yes	1	Minor injury	Self treated	House yard	15	15	5.9	Severe sarcopenia
397	60-74	Female	Kuala Langat	Malay	Married	Primary or less	Housewife	B 40	Never smoked	Never drinked	Active	No	No	Yes	No	No	0	No	20	No dependency	8	No dependency	No	0	No injuries	Not treated	Not applicable	15	13	5.4	Severe sarcopenia
398	60-74	Female	Kuala Langat	Chinese	Married	Primary or less	Housewife	B 40	Never smoked	Never drinked	Inactive	Yes	Yes	Yes	No	No	0	No	19	Dependency	5	Dependency	Yes	1	Minor injury	Outpatient	Outside the house	15.33	17	5.3	Severe sarcopenia
399	60-74	Female	Petaling	Malay	Widowed or divorced	Primary or less	Housewife	B 40	Never smoked	Never drinked	Inactive	Yes	Yes	Yes	No	No	0	No	19	Dependency	7	Dependency	No	0	No injuries	Not treated	Not applicable	15.33	14	4.9	Severe sarcopenia
400	>75	Female	Kuala Langat	Chinese	Married	Primary or less	Housewife	B 40	Never smoked	Never drinked	Inactive	No	Yes	Yes	No	No	0	No	17	Dependency	3	Dependency	Yes	1	Minor injury	Outpatient	Inside the house	15.33	14	5.1	Severe sarcopenia
401	60-74	Female	Petaling	Indian	Married	Primary or less	Housewife	B 40	Never smoked	Never drinked	Inactive	Yes	No	Yes	No	No	0	No	20	No dependency	8	No dependency	No	0	No injuries	Not treated	Not applicable	15.33	13	5.1	Severe sarcopenia
402	60-74	Female	Kuala Langat	Malay	Married	Tertiary	Retired	B 40	Never smoked	Never drinked	Inactive	No	Yes	No	Yes	Yes	0	No	19	Dependency	6	Dependency	Yes	1	Minor injury	Self treated	Inside the house	15.7	19	5.6	Severe sarcopenia
403	60-74	Female	Petaling	Indian	Married	Secondary	Housewife	B 40	Never smoked	Never drinked	Inactive	Yes	No	No	No	No	0	No	20	No dependency	8	No dependency	Yes	1	Minor injury	Self treated	Inside the house	15.7	17	5.4	Severe sarcopenia
404	>75	Female	Petaling	Indian	Married	Primary or less	Housewife	B 40	Never smoked	Never drinked	Inactive	No	Yes	Yes	No	Yes	2	Yes	12	Dependency	2	Dependency	Yes	2	Minor injury	Self treated	Outside the house	16	24	4.4	Severe sarcopenia
405	>75	Female	Petaling	Chinese	Widowed or divorced	Primary or less	Not employed	B 40	Never smoked	Never drinked	Active	No	No	Yes	No	No	0	No	20	No dependency	8	No dependency	No	0	No injuries	Not treated	Not applicable	16	15	5.2	Severe sarcopenia
406	60-74	Female	Petaling	Malay	Widowed or divorced	Secondary	Housewife	B 40	Never smoked	Never drinked	Inactive	Yes	Yes	Yes	No	No	0	No	20	No dependency	8	No dependency	Yes	1	Minor injury	Self treated	Inside the house	16	13	5.3	Severe sarcopenia
407	>75	Female	Kuala Langat	Malay	Married	Primary or less	Working	B 40	Never smoked	Never drinked	Inactive	No	Yes	No	No	No	0	No	20	No dependency	6	Dependency	Yes	1	Minor injury	Outpatient	Bathroom/toilet	16.33	18	4.9	Severe sarcopenia
408	60-74	Female	Petaling	Indian	Married	Primary or less	Housewife	M 40	Never smoked	Never drinked	Active	Yes	Yes	Yes	No	Yes	0	No	20	No dependency	8	No dependency	Yes	2	Minor injury	Self treated	House yard	16.67	19	5.6	Severe sarcopenia
409	60-74	Female	Petaling	Malay	Married	Primary or less	Housewife	B 40	Never smoked	Never drinked	Inactive	No	Yes	Yes	No	No	0	No	20	No dependency	7	Dependency	No	0	No injuries	Not treated	Not applicable	16.67	18	5.3	Severe sarcopenia
410	60-74	Female	Petaling	Indian	Married	Primary or less	Housewife	B 40	Never smoked	Never drinked	Inactive	Yes	Yes	Yes	No	No	0	No	20	No dependency	8	No dependency	Yes	1	Minor injury	Self treated	Bathroom/toilet	16.67	17	4	Severe sarcopenia
411	60-74	Female	Petaling	Indian	Married	Primary or less	Housewife	B 40	Never smoked	Never drinked	Inactive	Yes	Yes	Yes	No	No	0	No	20	No dependency	6	Dependency	No	0	No injuries	Not treated	Not applicable	16.67	16	5.6	Severe sarcopenia
412	60-74	Female	Petaling	Chinese	Married	Secondary	Working	B 40	Never smoked	Ex-drinker	Active	No	No	Yes	No	No	0	No	20	No dependency	8	No dependency	No	0	No injuries	Not treated	Not applicable	16.67	14	4.8	Severe sarcopenia
413	>75	Female	Kuala Langat	Malay	Widowed or divorced	Primary or less	Housewife	B 40	Never smoked	Never drinked	Inactive	No	Yes	No	No	No	0	No	18	Dependency	6	Dependency	Yes	1	Minor injury	Self treated	Inside the house	16.67	13	4.4	Severe sarcopenia
414	60-74	Female	Petaling	Malay	Married	Primary or less	Housewife	B 40	Never smoked	Never drinked	Inactive	Yes	Yes	Yes	No	No	0	No	19	Dependency	8	No dependency	Yes	1	Minor injury	Self treated	Inside the house	17	14	5.1	Severe sarcopenia
415	60-74	Female	Petaling	Indian	Married	Primary or less	Housewife	B 40	Never smoked	Never drinked	Inactive	Yes	Yes	Yes	No	No	0	No	20	No dependency	7	Dependency	Yes	1	Minor injury	Self treated	Inside the house	17.33	18	4.9	Severe sarcopenia
416	>75	Female	Petaling	Indian	Married	Primary or less	Housewife	B 40	Never smoked	Never drinked	Active	No	Yes	No	No	No	0	No	19	Dependency	5	Dependency	No	0	No injuries	Not treated	Not applicable	17.33	15	4.9	Severe sarcopenia
417	>75	Male	Kuala Langat	Malay	Married	Primary or less	Retired	B 40	Ex-smoker	Never drinked	Inactive	No	No	Yes	No	No	2	Yes	16	Dependency	2	Dependency	Yes	1	Minor injury	Outpatient	Inside the house	17.33	13	6.3	Severe sarcopenia
418	>75	Female	Petaling	Indian	Married	Primary or less	Housewife	B 40	Never smoked	Never drinked	Inactive	No	Yes	Yes	No	No	2	Yes	18	Dependency	5	Dependency	No	0	No injuries	Not treated	Not applicable	17.67	19	5.3	Severe sarcopenia
419	>75	Female	Petaling	Indian	Single	Primary or less	Housewife	B 40	Never smoked	Never drinked	Inactive	No	Yes	Yes	No	No	0	No	19	Dependency	6	Dependency	Yes	1	Minor injury	Outpatient	Inside the house	17.67	17	5.3	Severe sarcopenia
420	60-74	Female	Petaling	Indian	Married	Primary or less	Housewife	B 40	Never smoked	Never drinked	Inactive	Yes	No	Yes	No	No	0	No	20	No dependency	8	No dependency	No	0	No injuries	Not treated	Not applicable	17.67	17	5.2	Severe sarcopenia
421	60-74	Female	Petaling	Indian	Married	Primary or less	Housewife	B 40	Never smoked	Never drinked	Inactive	No	Yes	Yes	No	No	0	No	20	No dependency	8	No dependency	No	0	No injuries	Not treated	Not applicable	17.67	17	5.3	Severe sarcopenia
422	60-74	Female	Kuala Langat	Indian	Married	Secondary	Housewife	B 40	Never smoked	Never drinked	Inactive	No	No	No	No	No	0	No	20	No dependency	8	No dependency	Yes	1	Minor injury	Self treated	Inside the house	17.67	15	4.8	Severe sarcopenia
423	>75	Male	Kuala Langat	Chinese	Married	Primary or less	Not employed	B 40	Never smoked	Alcohol drinker	Inactive	Yes	Yes	No	No	No	0	No	16	Dependency	2	Dependency	Yes	1	Minor injury	Outpatient	Inside the house	18.67	20	6.7	Severe sarcopenia
424	>75	Male	Kuala Langat	Indian	Married	Secondary	Not employed	B 40	Never smoked	Never drinked	Inactive	Yes	No	Yes	No	No	0	No	16	Dependency	2	Dependency	Yes	1	Minor injury	Admitted to hospital	Bathroom/toilet	18.67	15	6.1	Severe sarcopenia
425	60-74	Female	Petaling	Chinese	Married	Primary or less	Housewife	B 40	Never smoked	Never drinked	Inactive	No	Yes	No	No	No	0	No	20	No dependency	8	No dependency	No	0	No injuries	Not treated	Not applicable	18.67	14	5.5	Severe sarcopenia
426	>75	Male	Kuala Langat	Malay	Married	Tertiary	Retired	B 40	Never smoked	Never drinked	Inactive	No	No	Yes	No	No	2	Yes	17	Dependency	2	Dependency	Yes	1	Minor injury	Self treated	Bathroom/toilet	19	19	6.2	Severe sarcopenia
427	>75	Male	Petaling	Indian	Married	Secondary	Retired	B 40	Never smoked	Never drinked	Active	No	Yes	Yes	No	No	0	No	18	Dependency	4	Dependency	Yes	1	Minor injury	Self treated	Inside the house	19.33	19	6.6	Severe sarcopenia
428	>75	Male	Petaling	Chinese	Married	Primary or less	Retired	B 40	Never smoked	Alcohol drinker	Inactive	No	Yes	No	No	No	2	Yes	17	Dependency	3	Dependency	Yes	2	Minor injury	Outpatient	House yard	19.33	16	5.4	Severe sarcopenia
429	>75	Male	Petaling	Indian	Married	Primary or less	Not employed	B 40	Never smoked	Alcohol drinker	Inactive	No	Yes	No	No	No	0	No	17	Dependency	3	Dependency	Yes	1	Minor injury	Self treated	Inside the house	20.33	19	6.6	Severe sarcopenia
430	60-74	Male	Kuala Langat	Indian	Married	Primary or less	Not employed	B 40	Active smoker	Alcohol drinker	Inactive	Yes	Yes	No	No	No	0	No	19	Dependency	7	Dependency	Yes	1	Minor injury	Self treated	Bathroom/toilet	20.67	16	5.8	Severe sarcopenia
431	>75	Male	Petaling	Indian	Married	Secondary	Not employed	B 40	Never smoked	Alcohol drinker	Inactive	No	Yes	Yes	Yes	No	0	No	17	Dependency	2	Dependency	Yes	2	Minor injury	Outpatient	Bathroom/toilet	20.67	14	6.8	Severe sarcopenia
432	>75	Male	Petaling	Indian	Married	Primary or less	Not employed	B 40	Never smoked	Never drinked	Inactive	Yes	Yes	Yes	No	No	0	No	20	No dependency	8	No dependency	Yes	1	Minor injury	Outpatient	Inside the house	21	16	6.8	Severe sarcopenia
433	>75	Male	Petaling	Indian	Married	Primary or less	Not employed	B 40	Never smoked	Ex-drinker	Inactive	No	Yes	No	Yes	No	0	No	13	Dependency	2	Dependency	Yes	4	Minor injury	Outpatient	Inside the house	21.33	21	6.6	Severe sarcopenia
434	>75	Male	Petaling	Chinese	Married	Secondary	Retired	B 40	Ex-smoker	Alcohol drinker	Active	No	No	Yes	No	No	1	No	20	No dependency	6	Dependency	Yes	1	Minor injury	Self treated	Inside the house	21.67	21	6.8	Severe sarcopenia
435	>75	Male	Petaling	Malay	Married	Primary or less	Retired	B 40	Ex-smoker	Never drinked	Inactive	Yes	Yes	Yes	Yes	No	0	No	17	Dependency	4	Dependency	Yes	1	Minor injury	Self treated	Inside the house	21.67	21	6.6	Severe sarcopenia
436	>75	Male	Kuala Langat	Malay	Married	Primary or less	Not employed	B 40	Active smoker	Never drinked	Inactive	No	No	No	No	No	0	No	19	Dependency	6	Dependency	Yes	1	Minor injury	Outpatient	Bathroom/toilet	21.67	16	6.3	Severe sarcopenia
437	>75	Male	Kuala Langat	Chinese	Married	Primary or less	Not employed	B 40	Never smoked	Never drinked	Inactive	Yes	Yes	No	No	No	0	No	17	Dependency	2	Dependency	Yes	1	Minor injury	Outpatient	Bathroom/toilet	22	18	6.3	Severe sarcopenia
438	>75	Male	Petaling	Indian	Married	Primary or less	Retired	B 40	Never smoked	Never drinked	Active	No	Yes	No	No	No	0	No	19	Dependency	5	Dependency	Yes	2	Minor injury	Outpatient	House yard	22	16	5.4	Severe sarcopenia
439	60-74	Male	Petaling	Indian	Married	Primary or less	Not employed	B 40	Never smoked	Never drinked	Inactive	No	Yes	Yes	No	No	0	No	20	No dependency	6	Dependency	Yes	1	Minor injury	Outpatient	Bathroom/toilet	22.33	13	6.7	Severe sarcopenia
440	60-74	Male	Kuala Langat	Indian	Married	Primary or less	Not employed	B 40	Never smoked	Alcohol drinker	Inactive	No	No	No	No	No	0	No	19	Dependency	7	Dependency	Yes	1	Minor injury	Outpatient	Bathroom/toilet	22.67	16	6	Severe sarcopenia
441	60-74	Male	Kuala Langat	Indian	Married	Primary or less	Not employed	B 40	Ex-smoker	Never drinked	Inactive	No	Yes	Yes	Yes	No	0	No	20	No dependency	8	No dependency	No	0	No injuries	Not treated	Not applicable	22.67	13	6.3	Severe sarcopenia
442	60-74	Male	Kuala Langat	Indian	Married	Tertiary	Retired	B 40	Never smoked	Never drinked	Inactive	Yes	Yes	Yes	No	No	0	No	20	No dependency	8	No dependency	No	0	No injuries	Not treated	Not applicable	23	14	6.6	Severe sarcopenia
443	60-74	Male	Petaling	Indian	Married	Secondary	Working	B 40	Never smoked	Ex-drinker	Inactive	No	Yes	Yes	No	No	0	No	20	No dependency	8	No dependency	No	0	No injuries	Not treated	Not applicable	23.67	20	6.7	Severe sarcopenia
444	60-74	Male	Petaling	Malay	Married	Secondary	Not employed	B 40	Ex-smoker	Never drinked	Inactive	No	No	Yes	No	No	0	No	20	No dependency	8	No dependency	Yes	1	Minor injury	Self treated	Inside the house	23.67	16	6.7	Severe sarcopenia
445	>75	Male	Petaling	Indian	Married	Secondary	Retired	B 40	Never smoked	Never drinked	Inactive	Yes	No	Yes	No	No	0	No	19	Dependency	8	No dependency	Yes	1	Minor injury	Outpatient	Inside the house	23.67	15	6	Severe sarcopenia
446	60-74	Male	Kuala Langat	Indian	Married	Secondary	Not employed	B 40	Ex-smoker	Alcohol drinker	Inactive	Yes	Yes	Yes	Yes	No	0	No	20	No dependency	8	No dependency	No	0	No injuries	Not treated	Not applicable	23.67	14	6.7	Severe sarcopenia
447	60-74	Male	Petaling	Malay	Married	Secondary	Not employed	B 40	Active smoker	Never drinked	Inactive	Yes	No	No	No	No	0	No	20	No dependency	8	No dependency	Yes	5	Minor injury	Self treated	Outside the house	24	13	6.6	Severe sarcopenia
448	60-74	Male	Petaling	Chinese	Married	Secondary	Retired	B 40	Never smoked	Never drinked	Inactive	No	No	Yes	No	No	0	No	20	No dependency	8	No dependency	Yes	1	Minor injury	Self treated	Inside the house	24.67	17	6.9	Severe sarcopenia
449	60-74	Male	Petaling	Malay	Married	Primary or less	Working	B 40	Active smoker	Never drinked	Inactive	No	Yes	No	No	No	0	No	20	No dependency	8	No dependency	Yes	1	Minor injury	Self treated	Bathroom/toilet	24.67	17	6.9	Severe sarcopenia
450	>75	Male	Kuala Langat	Indian	Married	Tertiary	Retired	B 40	Never smoked	Never drinked	Active	No	No	No	No	No	1	No	19	Dependency	8	No dependency	Yes	4	Severe injury	Admitted to hospital	Bathroom/toilet	24.67	16	6.4	Severe sarcopenia
451	>75	Male	Kuala Langat	Indian	Widowed or divorced	Secondary	Not employed	B 40	Never smoked	Never drinked	Inactive	Yes	Yes	No	No	No	0	No	20	No dependency	8	No dependency	No	0	No injuries	Not treated	Not applicable	24.67	13	6.9	Severe sarcopenia
452	60-74	Male	Petaling	Chinese	Married	Secondary	Not employed	B 40	Never smoked	Alcohol drinker	Inactive	No	No	No	No	No	0	No	20	No dependency	8	No dependency	Yes	1	Minor injury	Self treated	Inside the house	24.67	13	6.9	Severe sarcopenia
453	60-74	Male	Petaling	Indian	Widowed or divorced	Secondary	Not employed	B 40	Active smoker	Never drinked	Inactive	Yes	Yes	Yes	No	No	0	No	20	No dependency	8	No dependency	Yes	1	Minor injury	Self treated	Bathroom/toilet	25	17	6.4	Severe sarcopenia
454	60-74	Male	Kuala Langat	Chinese	Married	Primary or less	Not employed	B 40	Ex-smoker	Ex-drinker	Inactive	No	Yes	Yes	No	No	0	No	20	No dependency	8	No dependency	No	0	No injuries	Not treated	Not applicable	25.33	20	6.6	Severe sarcopenia
455	60-74	Male	Petaling	Malay	Married	Primary or less	Working	B 40	Active smoker	Never drinked	Inactive	Yes	Yes	Yes	No	No	0	No	20	No dependency	8	No dependency	Yes	2	Minor injury	Self treated	Outside the house	25.33	16	5.8	Severe sarcopenia
456	60-74	Male	Kuala Langat	Indian	Married	Secondary	Not employed	B 40	Never smoked	Alcohol drinker	Active	Yes	Yes	Yes	No	No	0	No	19	Dependency	6	Dependency	Yes	1	Minor injury	Outpatient	House yard	25.33	15	6.4	Severe sarcopenia
457	60-74	Male	Kuala Langat	Indian	Married	Primary or less	Working	B 40	Never smoked	Never drinked	Inactive	Yes	No	No	No	No	0	No	20	No dependency	8	No dependency	Yes	1	Minor injury	Self treated	Inside the house	25.33	15	6.9	Severe sarcopenia
458	60-74	Male	Kuala Langat	Malay	Married	Primary or less	Working	B 40	Active smoker	Never drinked	Inactive	Yes	Yes	Yes	No	No	0	No	19	Dependency	7	Dependency	Yes	1	Minor injury	Outpatient	Bathroom/toilet	25.33	13	6.2	Severe sarcopenia
459	>75	Male	Kuala Langat	Malay	Married	Primary or less	Working	B 40	Active smoker	Never drinked	Inactive	No	No	No	No	No	0	No	20	No dependency	6	Dependency	No	0	No injuries	Not treated	Not applicable	25.33	13	6.6	Severe sarcopenia
460	60-74	Male	Petaling	Indian	Married	Primary or less	Working	B 40	Never smoked	Alcohol drinker	Inactive	No	No	No	No	No	0	No	20	No dependency	8	No dependency	Yes	1	Minor injury	Self treated	Inside the house	25.33	13	6.7	Severe sarcopenia
461	60-74	Male	Kuala Langat	Indian	Married	Primary or less	Not employed	B 40	Active smoker	Alcohol drinker	Inactive	Yes	Yes	Yes	No	No	0	No	20	No dependency	5	Dependency	No	0	No injuries	Not treated	Not applicable	26.33	16	6.7	Severe sarcopenia
462	60-74	Male	Kuala Langat	Malay	Married	Secondary	Retired	B 40	Active smoker	Never drinked	Inactive	No	Yes	Yes	No	No	0	No	20	No dependency	8	No dependency	No	0	No injuries	Not treated	Not applicable	26.33	13	6.7	Severe sarcopenia
463	60-74	Male	Petaling	Indian	Married	Secondary	Working	B 40	Never smoked	Alcohol drinker	Active	Yes	Yes	Yes	Yes	No	0	No	20	No dependency	8	No dependency	Yes	1	Minor injury	Outpatient	Outside the house	26.67	22	6.7	Severe sarcopenia
464	60-74	Male	Kuala Langat	Indian	Married	Secondary	Working	B 40	Never smoked	Never drinked	Inactive	No	Yes	No	No	No	0	No	20	No dependency	8	No dependency	Yes	1	Minor injury	Outpatient	Inside the house	26.67	20	6.7	Severe sarcopenia
465	60-74	Male	Petaling	Indian	Married	Primary or less	Working	T 20	Active smoker	Alcohol drinker	Inactive	No	Yes	No	No	No	0	No	19	Dependency	8	No dependency	Yes	1	Minor injury	Self treated	Inside the house	26.67	19	6.6	Severe sarcopenia
466	60-74	Male	Kuala Langat	Malay	Married	Primary or less	Not employed	B 40	Never smoked	Never drinked	Active	No	No	No	No	No	0	No	20	No dependency	8	No dependency	No	0	No injuries	Not treated	Not applicable	26.67	16	6.7	Severe sarcopenia
467	60-74	Male	Kuala Langat	Indian	Single	Secondary	Retired	B 40	Never smoked	Alcohol drinker	Inactive	Yes	No	No	No	No	0	No	20	No dependency	8	No dependency	No	0	No injuries	Not treated	Not applicable	26.67	15	6.2	Severe sarcopenia
468	60-74	Male	Petaling	Indian	Married	Secondary	Not employed	B 40	Never smoked	Never drinked	Inactive	Yes	No	Yes	No	No	0	No	20	No dependency	8	No dependency	No	0	No injuries	Not treated	Not applicable	27	21	6.9	Severe sarcopenia
469	60-74	Male	Petaling	Malay	Married	Secondary	Not employed	B 40	Ex-smoker	Never drinked	Inactive	No	No	Yes	No	No	0	No	20	No dependency	8	No dependency	Yes	1	Minor injury	Self treated	Inside the house	27.67	18	6.6	Severe sarcopenia
